# Supplementary material
Source: PubMed Central journal article supplement (PMC3985843)
Supplement: ja411544w_si_001.pdf [file ja411544w_si_001.pdf]

# **Elucidation of Final Steps of the Marineosins Biosynthetic Pathway through Identification and Characterization of the Corresponding Gene Cluster**

Shaimaa M. Salem, Papireddy Kancharla, Galina Florova, Shweta Gupta, Wanli Lu, and Kevin A. Reynolds\*

Department of Chemistry, Portland State University, Portland, Oregon, 97201-3203

## **Corresponding Author**

\* Mailing address: Office of Academic Affairs, PO Box 751, Portland, Oregon 97207-0751.

Phone: 503 296 4829, Fax: 503 725 5262, Email: [reynoldk@pdx.edu](mailto:reynoldk@pdx.edu)

## **Supporting Information**

## Table of Contents

|                                                                                                                    |                                                                                                                                                                                   |      |
|--------------------------------------------------------------------------------------------------------------------|-----------------------------------------------------------------------------------------------------------------------------------------------------------------------------------|------|
| Figure S1.                                                                                                         | Fenical's Hypothesis for the Biosynthesis of Marineosin                                                                                                                           | S-4  |
| Figure S2.                                                                                                         | Snider's Hypothesis for the Biosynthesis of Marineosin                                                                                                                            | S-5  |
| Table S1.                                                                                                          | List of major cosmids generated throughout the study                                                                                                                              | S-6  |
| Table S2.                                                                                                          | List and description of major strains generated throughout the study                                                                                                              | S-6  |
| Table S3.                                                                                                          | List of primers                                                                                                                                                                   | S-7  |
| Construction of genomic library of <i>Streptomyces</i> CNQ-617 and PCR-based screening for marineosin gene cluster |                                                                                                                                                                                   | S-7  |
| Table S4-5.                                                                                                        | HPLC gradient used in purification of marineosin                                                                                                                                  | S-8  |
| Table S6.                                                                                                          | HPLC gradient used for purification of <b>9</b> and <b>10</b>                                                                                                                     | S-8  |
| Table S7a-b.                                                                                                       | HPLC gradient used for purification of <b>7</b> and <b>8</b>                                                                                                                      | S-9  |
| Table S8.                                                                                                          | LC-UV/MS analysis of <i>S. venezuelae</i> JND2                                                                                                                                    | S-9  |
| Table S9.                                                                                                          | LC-UV/MS analysis of <i>S. venezuelae</i> JND2ΔG                                                                                                                                  | S-10 |
| Table S10.                                                                                                         | LC-UV/MS analysis of <i>S. venezuelae</i> JND2ΔA                                                                                                                                  | S-10 |
| Figure S3.                                                                                                         | Recombination strategy employed to generate an integrative <i>mar</i> gene cluster                                                                                                | S-11 |
| Figure S4.                                                                                                         | Graphical summary of conserved domain hits obtained after NCBI CDD search of MarA primary amino acid sequence                                                                     | S-11 |
| Figure S5.                                                                                                         | Comparison between the total ion spectrum of wild type <i>S. venezuelae</i> and <i>S. venezuelae</i> JND2                                                                         | S-12 |
| Figure S6.                                                                                                         | LC/MS comparison between marineosin standard and JND2 extract                                                                                                                     | S-13 |
| Figure S7.                                                                                                         | Comparison between the MS/MS profile of marineosin standard and the compound with <i>m/z</i> 410.28 in <i>S. venezuelae</i> JND2 extract                                          | S-14 |
| Figure S8.                                                                                                         | <sup>1</sup> H NMR spectrum of marineosin isolated from <i>S. venezuelae</i> JND2 (600 MHz, Acetone-d6)                                                                           | S-15 |
| Figure S9.                                                                                                         | <sup>1</sup> H NMR spectrum of marineosin A ( <b>5</b> ) standard (500 MHz, Acetone-d6) (Copied from supporting information of Fenical's <i>Org. Lett.</i> , 2008, 10, 5505-5508) | S-15 |
| Figure S10a.                                                                                                       | Comparison between the MS profiles of <i>S. venezuelae</i> JND2ΔA, and JND2 strain                                                                                                | S-16 |
| Figure S10b.                                                                                                       | LC-UV/MS profile of <i>S. venezuelae</i> JND2ΔA.                                                                                                                                  | S-16 |
| Figure S11.                                                                                                        | HRMS (ESI) of premarineosin A ( <b>9</b> )                                                                                                                                        | S-17 |
| Figure S12.                                                                                                        | MS/MS profile of premarineosin A ( <b>9</b> )                                                                                                                                     | S-18 |
| Figure S13.                                                                                                        | HRMS (ESI) of 16-ketopremarineosin A ( <b>10</b> )                                                                                                                                | S-19 |
| Figure S14.                                                                                                        | MS/MS profile of 16-ketopremarineosin A ( <b>10</b> )                                                                                                                             | S-20 |
| Figure S15.                                                                                                        | IR spectrum of premarineosin A ( <b>9</b> ), and 16-ketopremarineosin A ( <b>10</b> )                                                                                             | S-21 |
| Figure S16.                                                                                                        | <sup>1</sup> H NMR spectrum of premarineosin A ( <b>9</b> ) (600 MHz, Acetone-d6)                                                                                                 | S-22 |
| Figure S17.                                                                                                        | <sup>1</sup> H NMR spectrum of 16-ketopremarineosin A ( <b>10</b> ) (600 MHz, Acetone-d6)                                                                                         | S-23 |
| Figure S18.                                                                                                        | 2D HSQC ( <sup>1</sup> H→ <sup>13</sup> C) spectrum of <b>9</b> and <b>10</b>                                                                                                     | S-24 |
| Figure S19.                                                                                                        | Expanded 2D HSQC ( <sup>1</sup> H→ <sup>13</sup> C) spectrum of <b>9</b> and <b>10</b>                                                                                            | S-25 |
| Figure S20.                                                                                                        | 2D TOCSY ( <sup>1</sup> H↔ <sup>1</sup> H) spectrum of <b>9</b> and <b>10</b>                                                                                                     | S-26 |
| Figure S21.                                                                                                        | Expanded 2D TOCSY ( <sup>1</sup> H↔ <sup>1</sup> H) spectrum of <b>9</b>                                                                                                          | S-27 |
| Figure S22.                                                                                                        | Expanded 2D TOCSY ( <sup>1</sup> H↔ <sup>1</sup> H) spectrum of <b>10</b>                                                                                                         | S-28 |
| Figure S23.                                                                                                        | 2D COSY ( <sup>1</sup> H↔ <sup>1</sup> H) spectrum of <b>9</b> and <b>10</b>                                                                                                      | S-29 |
| Figure S24.                                                                                                        | 2D HMBC ( <sup>1</sup> H→ <sup>13</sup> C) spectrum of <b>10</b>                                                                                                                  | S-30 |
| Table S11.                                                                                                         | Selected COSY ( <sup>1</sup> H↔ <sup>1</sup> H) and TOCSY ( <sup>1</sup> H↔ <sup>1</sup> H) NMR correlations for <b>9</b>                                                         | S-31 |
| Table S12.                                                                                                         | Selected COSY ( <sup>1</sup> H↔ <sup>1</sup> H) and TOCSY ( <sup>1</sup> H↔ <sup>1</sup> H) NMR correlations for <b>10</b>                                                        | S-32 |
| Table S13.                                                                                                         | NMR spectral data for <b>10</b> and selected HMBC ( <sup>1</sup> H→ <sup>13</sup> C) correlations                                                                                 | S-33 |

|             |                                                                                                                                                                                         |      |
|-------------|-----------------------------------------------------------------------------------------------------------------------------------------------------------------------------------------|------|
| Table S14.  | Comparison of NMR spectral data for <b>9</b> and <b>10</b>                                                                                                                              | S-34 |
| Figure S25. | Comparison of the MS profiles of <i>S. venezuelae</i> JND2ΔG, JND2 strain, and wild type <i>S. venezuelae</i>                                                                           | S-35 |
| Figure S26. | LC-UV/MS profile of <i>S. venezuelae</i> JND2ΔG                                                                                                                                         | S-35 |
| Figure S27. | HRMS (ESI) of 23-hydroxyundecylprodiginine ( <b>7</b> )                                                                                                                                 | S-36 |
| Figure S28. | MS/MS profile of 23-hydroxyundecylprodiginine ( <b>7</b> )                                                                                                                              | S-37 |
| Figure S29. | <sup>1</sup> H NMR spectrum of 23-hydroxyundecylprodiginine ( <b>7</b> ) (600 MHz, Acetone-d6)                                                                                          | S-38 |
| Figure S30. | <sup>1</sup> H NMR spectrum of undecylprodiginine HCl ( <b>2</b> ) standard (600 MHz, Acetone-d6)                                                                                       | S-38 |
| Figure S31. | <sup>1</sup> H NMR spectrum showing comparison between the splitting pattern of methyl protons at C-24 in undecylprodiginine ( <b>2</b> ) and 23-hydroxyundecylprodiginine ( <b>7</b> ) | S-39 |
| Figure S32. | Expanded 2D COSY ( <sup>1</sup> H↔ <sup>1</sup> H) spectrum of 23-hydroxyundecylprodiginine ( <b>7</b> )                                                                                | S-39 |
| Figure S33. | 2D TOCSY ( <sup>1</sup> H↔ <sup>1</sup> H) spectrum of 23-hydroxyundecylprodiginine ( <b>7</b> )                                                                                        | S-40 |
| Table S15.  | <sup>1</sup> H NMR spectral data for <b>7</b> (600 MHz, Acetone-d6) and side by side comparison of <b>7</b> and <b>2</b>                                                                | S-41 |
| Figure S34. | <sup>1</sup> H NMR spectrum of 23-ketoundecylprodiginine ( <b>8</b> ) (600 MHz, Acetone-d6)                                                                                             | S-42 |
| Figure S35. | HRMS (ESI) of 23-ketoundecylprodiginine ( <b>8</b> )                                                                                                                                    | S-43 |
| Figure S36. | 2D COSY ( <sup>1</sup> H↔ <sup>1</sup> H) spectrum of 23-ketoundecylprodiginine ( <b>8</b> )                                                                                            | S-44 |
| Figure S37. | 2D TOCSY ( <sup>1</sup> H↔ <sup>1</sup> H) spectrum of 23-ketoundecylprodiginine ( <b>8</b> )                                                                                           | S-45 |
| Figure S38. | 2D HSQC ( <sup>1</sup> H↔ <sup>1</sup> H) spectrum of 23-ketoundecylprodiginine ( <b>8</b> )                                                                                            | S-46 |
| Figure S39. | 2D HMBC ( <sup>1</sup> H→ <sup>13</sup> C) spectrum of 23-ketoundecylprodiginine ( <b>8</b> )                                                                                           | S-47 |
| Table S16.  | NMR spectral data, and selected HMBC ( <sup>1</sup> H→ <sup>13</sup> C correlations) for <b>8</b> (600 MHz, Acetone-d6)                                                                 | S-48 |
| Figure S40. | Sequence alignment of MarG and RedG with other Rieske-oxygenases                                                                                                                        | S-49 |
| Figure S41. | Total ion chromatogram (TIC) of total extract of <i>S. venezuelae</i> expressing MarG after feeding of <b>7</b> , <b>8</b> and [23-d]- <b>7</b>                                         | S-50 |
| References  |                                                                                                                                                                                         | S-50 |

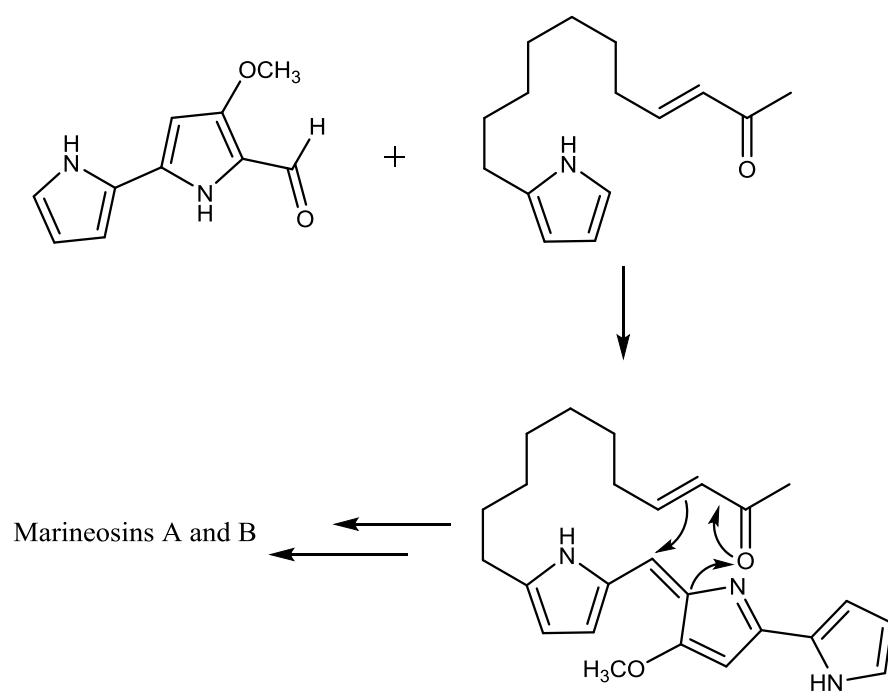

**Figure S1: Fenical's Hypothesis for the Biosynthesis of Marineosin.** Fenical and co-workers postulates the formation of enone-undecylprodiginine intermediate.<sup>1</sup>

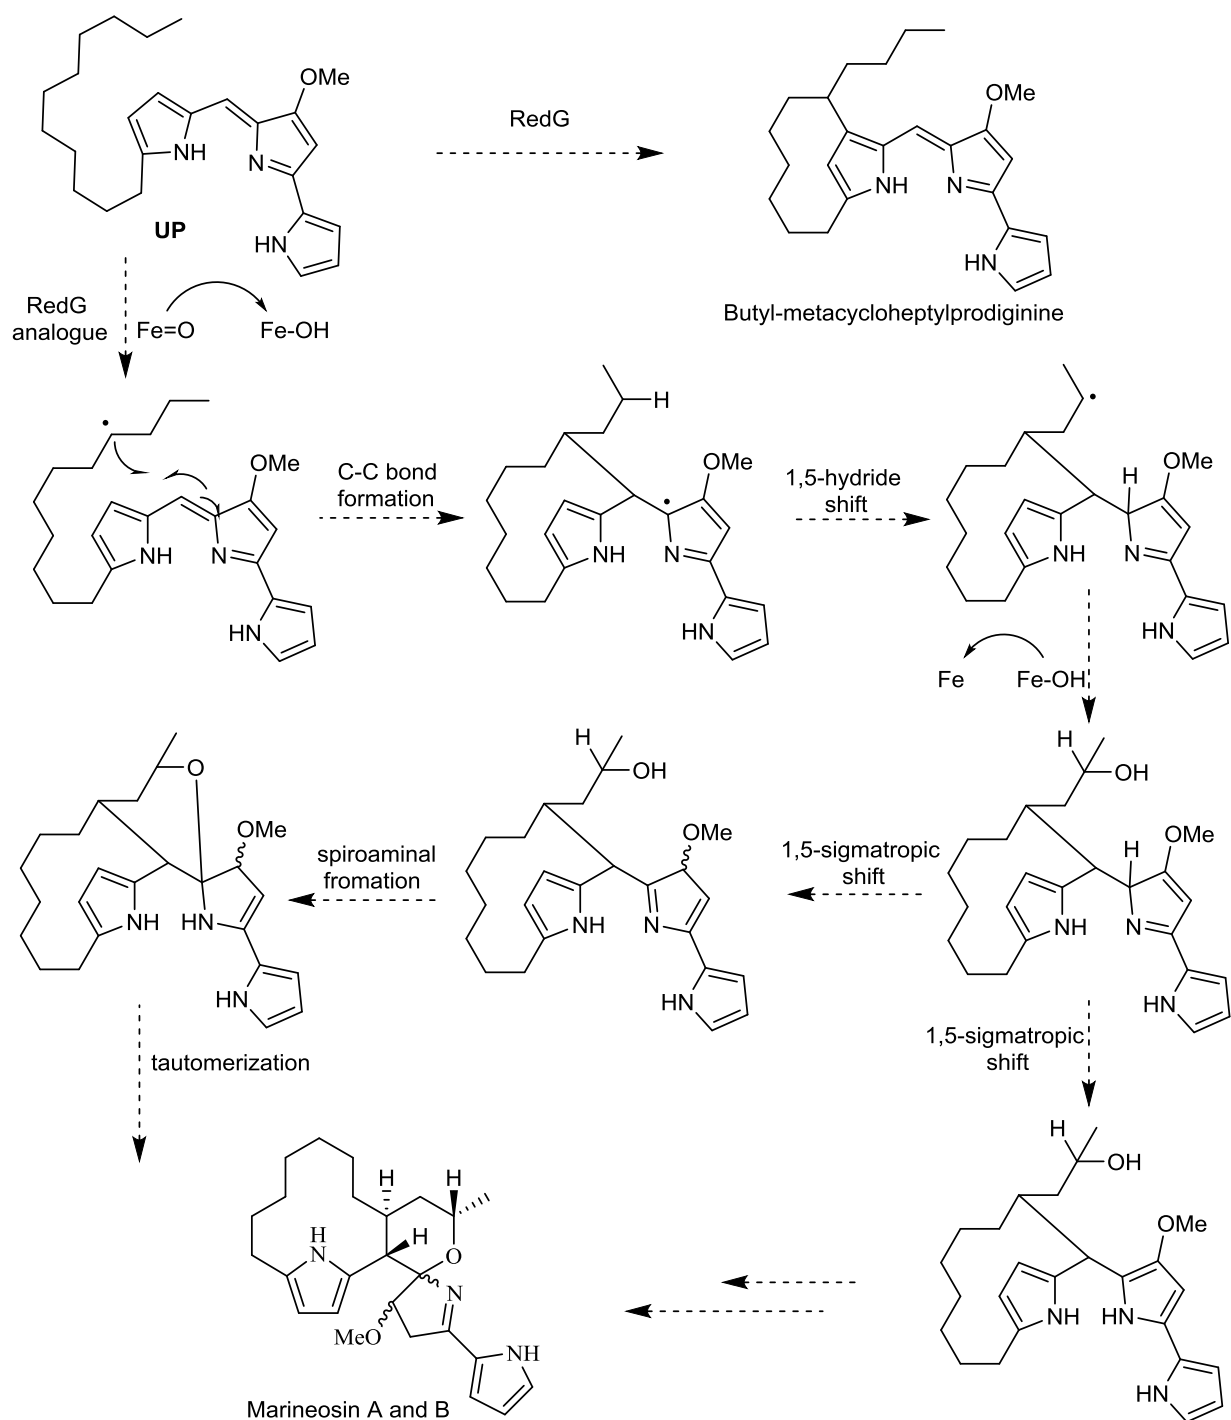

**Figure S2: Snider's Hypothesis for the Biosynthesis of Marineosin.** Snider and co-workers postulates the formation of a macrocyclic free radical that undergoes a number of hydride shifts mediated by a RedG homolog.<sup>2</sup>

**Table S1. List of major cosmids generated throughout the study**

| <b>Name of cosmid</b>  | <b>Description</b>                                                                                                       |
|------------------------|--------------------------------------------------------------------------------------------------------------------------|
| 8A7 cosmid             | A SuperCos1 cosmid carrying the <i>mar</i> gene cluster together with 6 kbp of primary metabolic genes                   |
| pMAR cosmid            | 8A7 cosmid in which the <i>bla</i> gene was replaced with <i>oriT</i> , $\Phi C_{31}$ <i>int</i> , and <i>aac(3)IV</i> . |
| pMAR $\Delta$ G cosmid | 8A7 cosmid in which <i>marG</i> gene was replaced with <i>aadA</i> gene conferring resistance to spectinomycin           |
| pMAR $\Delta$ A cosmid | 8A7 cosmid in which <i>marA</i> gene was replaced with <i>aadA</i> gene conferring resistance to spectinomycin           |

**Table S2. List and description of major strains generated throughout the study**

| <b>Name of strain</b>                          | <b>Description</b>                                                                                                                                      |
|------------------------------------------------|---------------------------------------------------------------------------------------------------------------------------------------------------------|
| <i>E. coli</i> ET12537/pUZ8002/pMAR            | Donor <i>E. coli</i> strain harboring pMAR cosmid and used for conjugation with <i>S. venezuelae</i>                                                    |
| <i>S. venezuelae</i> JND2                      | <i>S. venezuelae</i> expressing the <i>mar</i> gene cluster. It produces marineosin and other metabolites.                                              |
| <i>E. coli</i> ET12537/pUZ8002/pMAR $\Delta$ A | Donor <i>E. coli</i> strain harboring pMAR $\Delta$ A cosmid and used for conjugation with <i>S. venezuelae</i>                                         |
| <i>S. venezuelae</i> JND2 $\Delta$ G           | <i>S. venezuelae</i> JND2 strain in which <i>marG</i> is replaced with <i>aadA</i> gene. This strain produces 23-hydroxy- and 23-ketoundecylprodiginine |
| <i>S. venezuelae</i> JND2 $\Delta$ A           | <i>S. venezuelae</i> JND2 strain in which <i>marA</i> is replaced with <i>aadA</i> gene. This strain produces premarineosin and 16-ketopremarineosin    |

**Table S3: List of primers**

| <b>Degenerate primers used for PCR amplification of <i>marG</i> probe</b>                                               |                                                                                |
|-------------------------------------------------------------------------------------------------------------------------|--------------------------------------------------------------------------------|
| <i>marG</i> _FWD                                                                                                        | 5'- TCSCACAGYTSCATCG -3'                                                       |
| <i>marG</i> _REV                                                                                                        | 5'- YRTARCGGGTGARTKS -3'                                                       |
| <b>Degenerate primers used for PCR amplification of <i>marW</i> probe</b>                                               |                                                                                |
| <i>marW</i> _FWD                                                                                                        | 5'- GCCATCACCGAGCCGGAGGCCGGTTCNGAY -3'                                         |
| <i>marW</i> _REV                                                                                                        | 5'- YTGACGGCCGCCTCACTGACCGGATCTTCGC -3'                                        |
| <b>Primers used for PCR amplification of <i>aac(3)IV</i>, <i>oriT</i>, and <math>\Phi C_{3int}</math> from pSET1520</b> |                                                                                |
| pSET-FWD                                                                                                                | 5'- TGATAAATGCTTCAATAATATTGAAAAAGGAAGAGTATGGTGCAATACGA<br>ATGGCGAAA -3'        |
| pSET-REV                                                                                                                | 5'- AATCTAAAGTATATATGAGTAAACTTGGTCTGACAGTTACTACGCCGCTAC GTCTTC C -3'           |
| <b>Primers for amplification of <i>aadA</i> gene</b>                                                                    |                                                                                |
| <i>aadA</i> _FWD                                                                                                        | 5'- <u>GTATAC</u> GGCTGACGCCGTTGGATA -3'                                       |
| <i>aadA</i> _REV                                                                                                        | 5'- <u>GTATAC</u> TTATTTGCCGACTACCTTGGT -3'                                    |
| <b>Primers used for <i>marG</i> disruption</b>                                                                          |                                                                                |
| <i>marG</i> _KO_FWD                                                                                                     | 5'- GTGCTCGGCGGGAAACTCGAAAGAGAGAGGGACTGCATGGTATACGGCT<br>GACGCCGTTG -3'        |
| <i>marG</i> _KO_REV                                                                                                     | 5'- GCCGTACCATGCGTCTTCGTCCGGGACGCCGCCGC<br><u>GTCAG</u> TATACTTATTTGCCGACT -3' |
| <b>Primers used for <i>marA</i> disruption</b>                                                                          |                                                                                |
| <i>marA</i> _KO_FWD                                                                                                     | 5'- TTGTACGCCACGCTCCGGTGCACAGAATCGTGGCCATGGTATACGGC<br>TGACGCCGTTG -3'         |
| <i>marA</i> _KO_REV                                                                                                     | 5'- AGAGGCGACGGAGATCATGACGGGATACTTCTGGCGTCAGTATACTTATTT<br>GCCGACT -3'         |
| <b>Outer primers used to verify gene deletion</b>                                                                       |                                                                                |
| <i>marG</i> _Out_FWD                                                                                                    | 5'- ACACCGACGCGACATGGACC -3'                                                   |
| <i>marG</i> _Out_REV                                                                                                    | 5'- CGGGCAGCTCCTCGTCCT -3'                                                     |
| <i>marA</i> _Out_FWD                                                                                                    | 5'- GTCGGCCGGTGACGGTGC -3'                                                     |
| <i>marA</i> _Out_REV                                                                                                    | 5'- GGAACGCGACGACAGCTAT -3'                                                    |

**Construction of genomic library of *Streptomyces* CNQ-617 and PCR-based screening for marinesin gene cluster.** A cosmid library was constructed using the Supercos1 Cosmid Vector Kit (Agilent, CA). Purified total genomic DNA of *Streptomyces* CNQ617 was partially digested with *Sau3A*, ligated with Supercos1 and packaged using Gigapack II Gold (Agilent, CA). Colony hybridization was carried out and library was screened using <sup>32</sup>P labeled *marG* and *marW* DNA fragments as probes. Prime-It II Random Primer Labeling Kit (Agilent, CA) was used to label *marW* 617 bp DNA

fragment. A selected cosmid 8A7 was shotgun cloned, sequenced, and the gaps were closed by primer walking by MWG, Eurofins. The sequences were assembled, analyzed and annotated using Staden package (Gap4), MacVector (Oxford Molecular Group), BLAST searches on NCBI and Wellcome Trust Sanger Institute (StrepDB) servers.

**Table S4. HPLC gradient used in first purification of marineosin**

| Time (min) | Flow (ml/min) | % A <sup>1</sup> | % B <sup>2</sup> |
|------------|---------------|------------------|------------------|
| 0          | 10.0          | 90.0             | 10.0             |
| 2.0        | 10.0          | 90.0             | 10.0             |
| 40.0       | 10.0          | 0.0              | 100.0            |
| 50.0       | 10.0          | 0.0              | 100.0            |
| 51.0       | 10.0          | 90.0             | 10.0             |
| 60.0       | 10.0          | 90.0             | 10.0             |

<sup>1</sup>Buffer A: water/acetonitrile/methanol (5:1:4), <sup>2</sup>Buffer B: 100% methanol  
Peak eluting at 45 min was collected and subjected to a second HPLC using table S5

**Table S5. HPLC gradient used in second purification of marineosin**

| Time (min) | Flow (ml/min) | % A <sup>1</sup> | % B <sup>2</sup> |
|------------|---------------|------------------|------------------|
| 0.0        | 1.0           | 75.0             | 25.0             |
| 7.5        | 1.0           | 75.0             | 25.0             |
| 8.0        | 1.0           | 50.0             | 50.0             |
| 13.0       | 1.0           | 50.0             | 50.0             |
| 13.5       | 1.0           | 25.0             | 75.0             |
| 21.0       | 1.0           | 25.0             | 75.0             |
| 21.5       | 1.0           | 0.0              | 100.0            |
| 25.0       | 1.0           | 0.0              | 100.0            |
| 25.5       | 1.0           | 75.0             | 25.0             |
| 30.0       | 1.0           | 75.0             | 25.0             |

<sup>1</sup>Buffer A: water acidified with 0.05 % formic acid, <sup>2</sup>Buffer B: acetonitrile acidified with 0.05 % formic acid  
Peak with retention time of 12 minutes was collected and dried under vacuum to yield pure marineosin

**Table S6. HPLC conditions for purification of 9 and 10**

| Time (min) | Flow (ml/min) | % A <sup>1</sup> | % B <sup>2</sup> |
|------------|---------------|------------------|------------------|
| 0          | 4.0           | 95.0             | 5.0              |
| 30.0       | 4.0           | 15.0             | 85.0             |
| 35.0       | 4.0           | 15.0             | 85.0             |
| 36.0       | 4.0           | 95.0             | 5.0              |
| 46.0       | 4.0           | 95.0             | 5.0              |

<sup>1</sup>Buffer A: water/acetonitrile/methanol (5:1:4), <sup>2</sup>Buffer B: 100% methanol  
Column used: 10.0 × 250.0 mm, 5 μm, reverse phase <sup>18</sup>C- Phenomenex  
Peaks with retention times 15 and 21 minutes, correspond to 16-ketopremarineosin A (10) and premarineosin A (9) respectively



**Table S7a. HPLC conditions for purification of 7 and 8 (First round)**

| Time (min) | Flow (ml/min) | % A <sup>1</sup> | % B <sup>2</sup> |
|------------|---------------|------------------|------------------|
| 0          | 10.0          | 90.0             | 10.0             |
| 2.0        | 10.0          | 90.0             | 10.0             |
| 40.0       | 10.0          | 0.0              | 100.0            |
| 50.0       | 10.0          | 0.0              | 100.0            |
| 51.0       | 10.0          | 90.0             | 10.0             |
| 60.0       | 10.0          | 90.0             | 10.0             |

<sup>1</sup>Buffer A: water/acetonitrile/methanol (5:1:4), <sup>2</sup>Buffer B: 100% methanol  
Column used: 20.0 × 250.0 mm, 10 μm, reverse phase Ascentis <sup>18</sup>C-column (Supelco)  
Peak eluting at 25 min was collected and subjected to a second HPLC using table S7b

**Table S7b. HPLC conditions for purification of 7 and 8 (Second round)**

| Time (min) | Flow (ml/min) | % A <sup>1</sup> | % B <sup>2</sup> |
|------------|---------------|------------------|------------------|
| 0          | 4.0           | 95.0             | 5.0              |
| 25.0       | 4.0           | 0.0              | 100.0            |
| 30.0       | 4.0           | 0.0              | 100.0            |
| 31.0       | 4.0           | 95.0             | 5.0              |
| 40.0       | 4.0           | 95.0             | 5.0              |

<sup>1</sup>Buffer A: water/acetonitrile/methanol (5:1:4), <sup>2</sup>Buffer B: 100% methanol  
Column used: 10.0 × 250.0 mm, 5 μm, reverse phase <sup>18</sup>C- Phenomenex

**Table S8: LC/MS analysis of *S. venezuelae* JND2**

| Time (min) | Flow (ml/min) | % A <sup>1</sup> | % B <sup>2</sup> |
|------------|---------------|------------------|------------------|
| 0          | 0.2           | 90.0             | 10.0             |
| 5.0        | 0.2           | 90.0             | 10.0             |
| 70.0       | 0.2           | 0.0              | 100.0            |
| 80.0       | 0.2           | 0.0              | 100.0            |
| 81.0       | 0.2           | 90.0             | 10.0             |
| 90.0       | 0.2           | 90.0             | 10.0             |

<sup>1</sup>Buffer A: Water acidified with 0.05 % formic acid, <sup>2</sup>Buffer B: Methanol acidified with 0.05 % formic acid

**Table S9. LC-UV/MS analysis of *S. venezuelae* JND2ΔG**

| Time (min) | Flow (ml/min) | % A <sup>1</sup> | % B <sup>2</sup> |
|------------|---------------|------------------|------------------|
| 0          | 0.2           | 90.0             | 10.0             |
| 5.0        | 0.2           | 90.0             | 10.0             |
| 40.0       | 0.2           | 0.0              | 100.0            |
| 50.0       | 0.2           | 0.0              | 100.0            |
| 51.0       | 0.2           | 90.0             | 10.0             |
| 60.0       | 0.2           | 90.0             | 10.0             |

<sup>1</sup>Buffer A: 5% ACN/H<sub>2</sub>O acidified with 0.05 % formic acid, <sup>2</sup>Buffer B: acetonitrile acidified with 0.05 % formic acid

**Table S10. LC-UV/MS analysis of *S. venezuelae* JND2ΔA**

| Time (min) | Flow (ml/min) | % A <sup>1</sup> | % B <sup>2</sup> |
|------------|---------------|------------------|------------------|
| 0          | 0.2           | 95.0             | 5.0              |
| 2.0        | 0.2           | 95.0             | 5.0              |
| 25.0       | 0.2           | 0.0              | 100.0            |
| 30.0       | 0.2           | 0.0              | 100.0            |
| 31.0       | 0.2           | 95.0             | 5.0              |
| 36.0       | 0.2           | 95.0             | 5.0              |

<sup>1</sup>Buffer A: 5% ACN/H<sub>2</sub>O acidified with 0.05 % formic acid, <sup>2</sup>Buffer B: acetonitrile acidified with 0.05 % formic acid

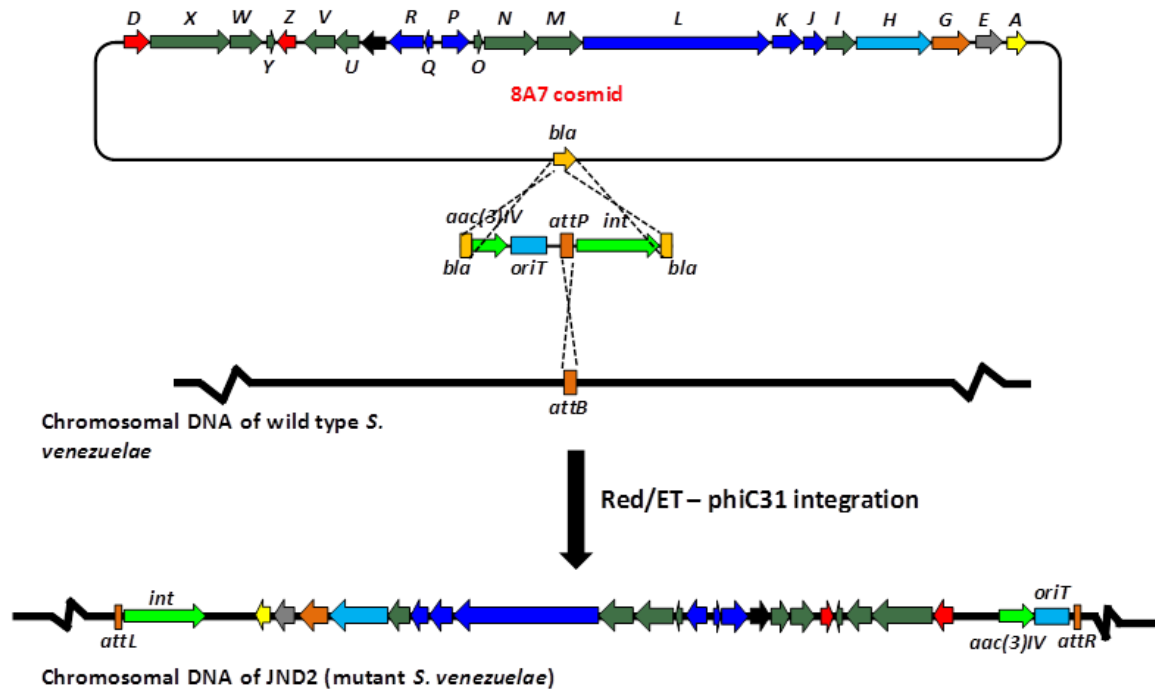

**Figure S3. Recombination strategy employed to generate an integrative *mar* gene cluster.** pSET 1520 plasmid was used as a template for PCR amplification of *oriT*, *phiC31* integrase and *aac(3)IV*. The PCR product was used to replace the *bla* gene in cosmid 8A7 via PCR targeted recombination followed by site-specific integration of the modified 8A7 cosmid into *S. venezuelae*. *bla* =  $\beta$ -lactamase; *aac(3)IV* = apramycin resistance gene; *oriT* = origin of transfer; *attP/attB* = phiC31 attachment site of phage/bacteria; *int* = phiC31 integrase

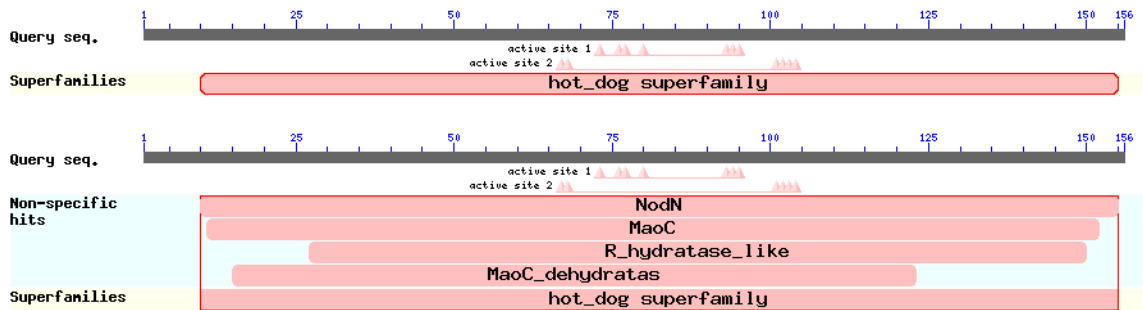

**Figure S4: Graphical summary of conserved domain hits obtained after NCBI CDD search of MarA primary amino acid sequence (Query).** The figure indicates that MarA belong to the HotDog superfamily of enzymes.

S-venz\_120112094728 #6-227 RT: 0.07-1.99 AV: 222 NL: 1.35E7  
T: FTMS + p ESI Full ms [200.0]

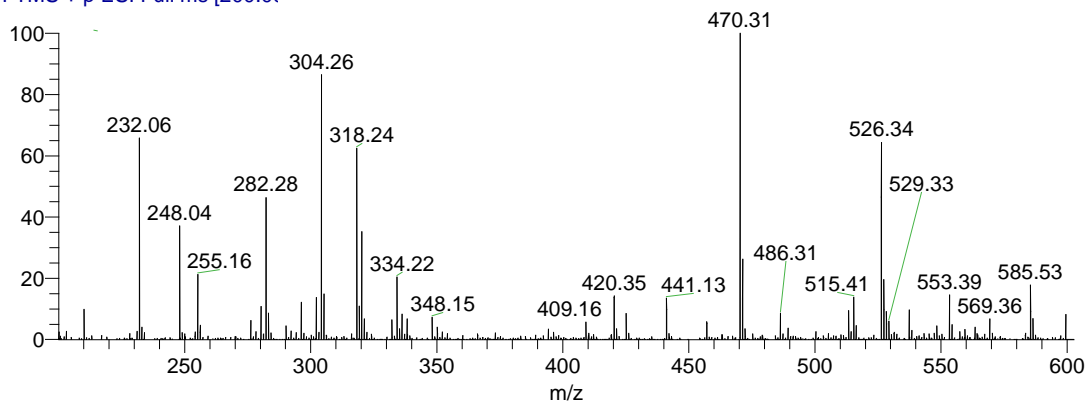

JND2\_120112095025 #7-230 RT: 0.07-2.00 AV: 224 NL: 1.13E7  
T: FTMS + p ESI Full ms [200.0]

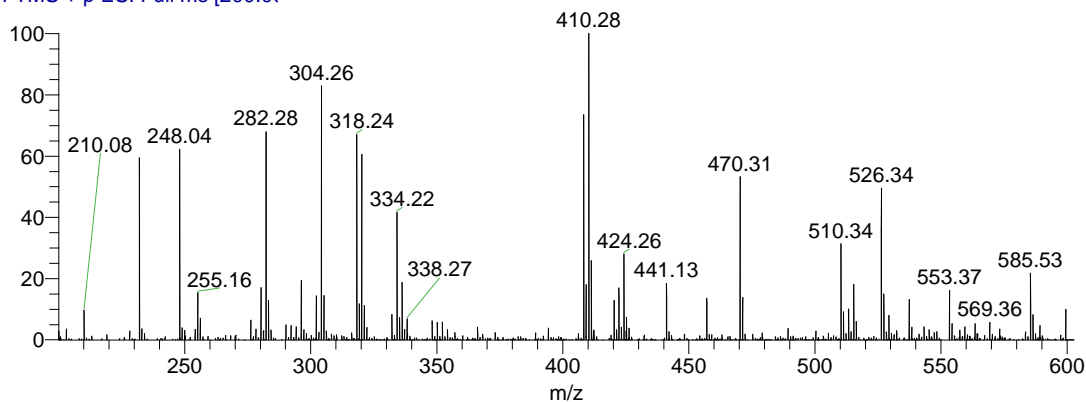

**Figure S5.** Comparison between the total ion spectrum of crude extract of wild type *S. venezuelae* (top panel) and *S. venezuelae* JND<sub>2</sub> (bottom panel). The MS profile of the wild type *S. venezuelae* (top panel) shows the presence of methymycin and pikromycin antibiotics with  $[M + H]^+$  of  $m/z$  470.31 and 526.34 respectively, while the MS profile of *S. venezuelae* JND<sub>2</sub> shows the presence of marineosin with  $[M + H]^+$  of  $m/z$  410.28 in addition to methymycin, pikromycin and other new compounds.

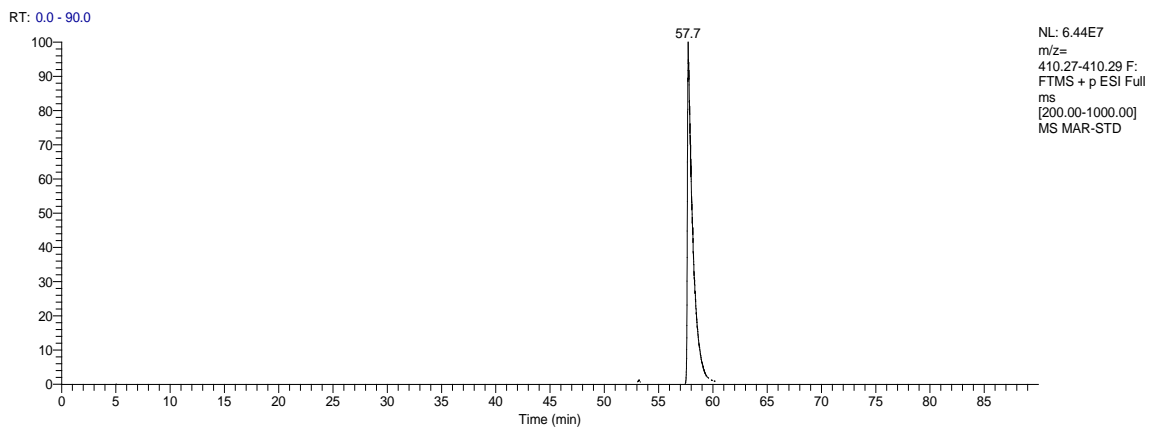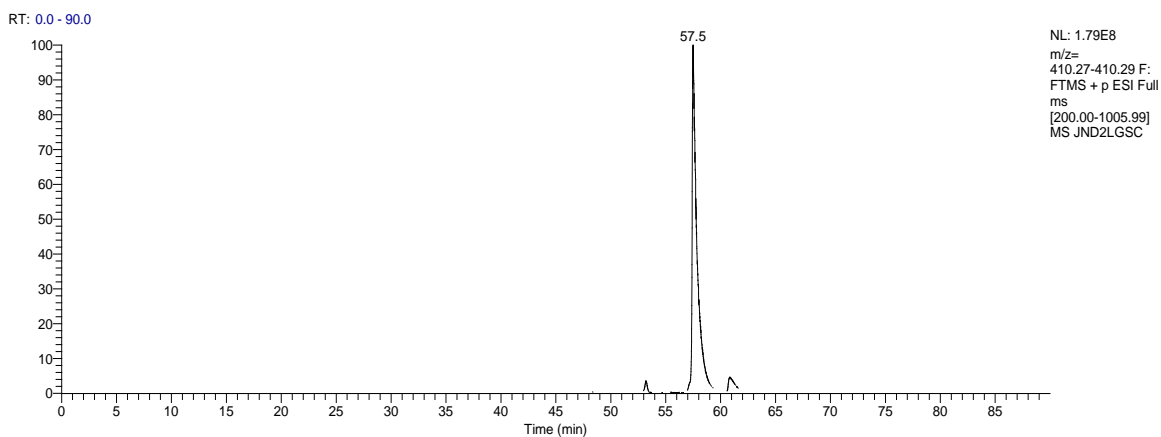

**Figure S6. LC/MS comparison between marineosin standard and JND<sub>2</sub> extract.** An extracted ion chromatogram (EIC) of  $m/z$  410.28 for marineosin standard (top panel) and JND<sub>2</sub> extract (bottom panel). For LC gradient used, please refer to Table S8.

MarSTD(CE15) #1-187 RT: 0.08-1.99 AV: 187 NL: 2.60E6  
T: FTMS + c ESI Full ms2 410.29@cid15.(

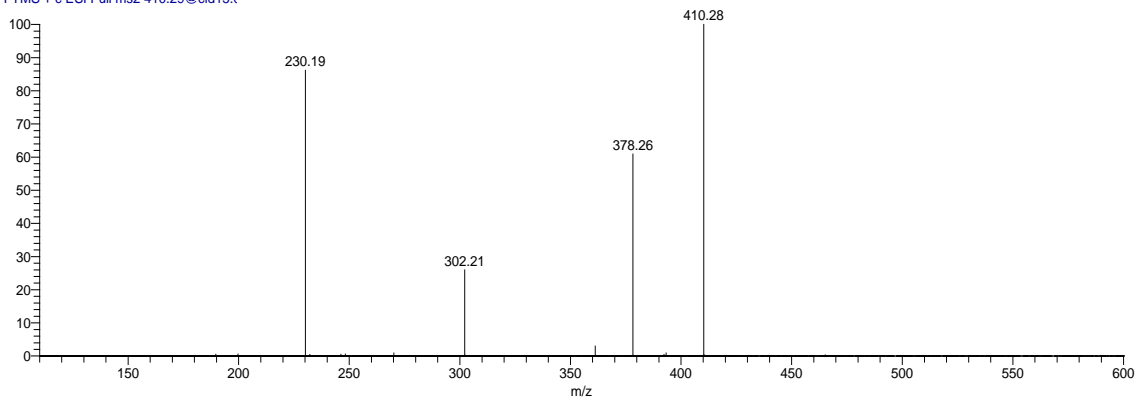

JND2cells(CE15) #3-186 RT: 0.10-2.00 AV: 184 NL: 1.36E6  
T: FTMS + c ESI Full ms2 410.28@cid15.(

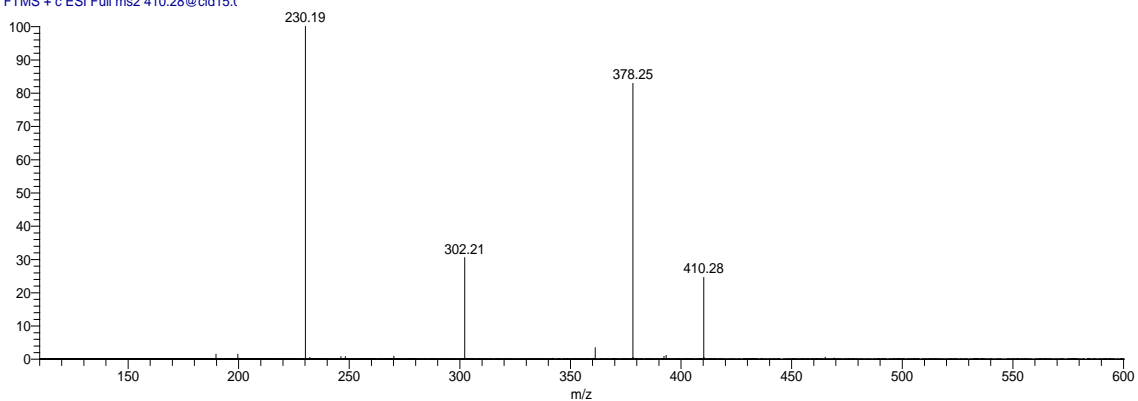

**Figure S7. Comparison between the MS/MS profile of marineosin standard (top panel) and the compound with m/z 410.28 in *S. venezuelae* JND<sub>2</sub> extract (bottom panel).** Compounds in both top and bottom panels show the presence of identical fragment ions m/z 230.19, m/z 302.21 and m/z 378.25.

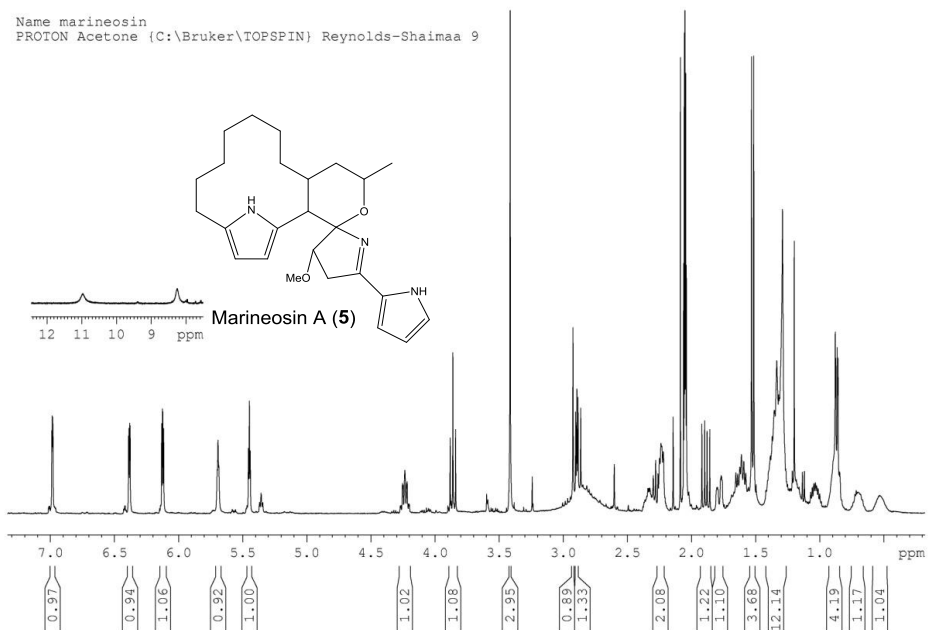

Figure S8.  $^1\text{H}$  NMR spectrum of marineosin A (5) isolated from *S. venezuelae* JND2 (600 MHz, Acetone- $d_6$ )

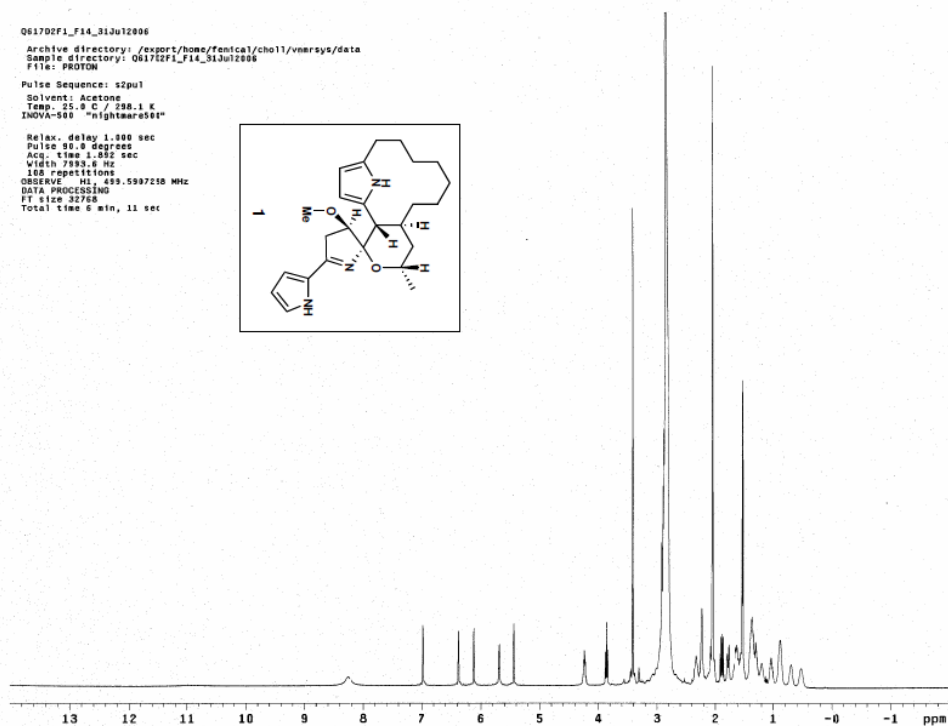

Figure S9.  $^1\text{H}$  NMR spectrum of marineosin A (5) standard (500 MHz, Acetone- $d_6$ ). Copied from supporting information of reference 1

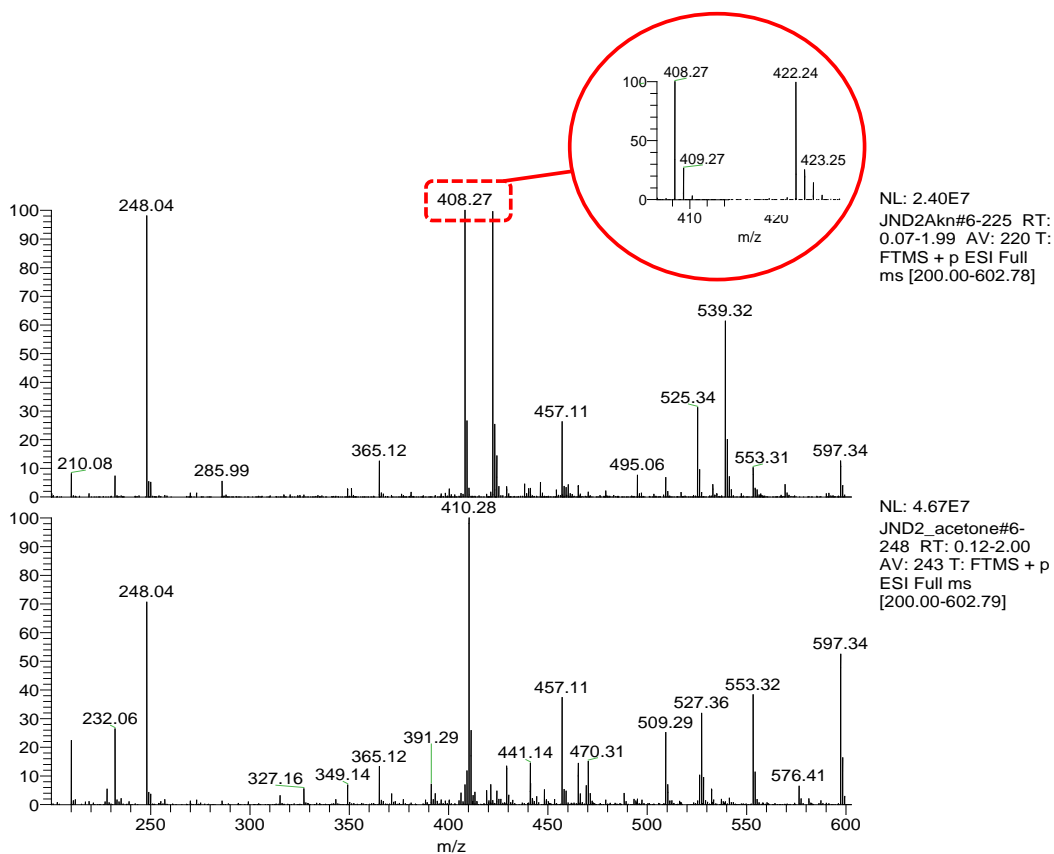

**Figure S10a.** Comparison between the MS profiles of crude extracts of *S. venezuelae* JND2ΔA (top panel), and JND2 strain (bottom panel). MS profile of JND2ΔA strain (top panel) shows two main compounds with  $m/z$  408.26 and 422.24 (for illustration purpose, the two peaks are highlighted and magnified) while the MS profile of JND2 strain shows the same two compounds, to a much lower extent relative to marineosin,  $m/z$  410.28.

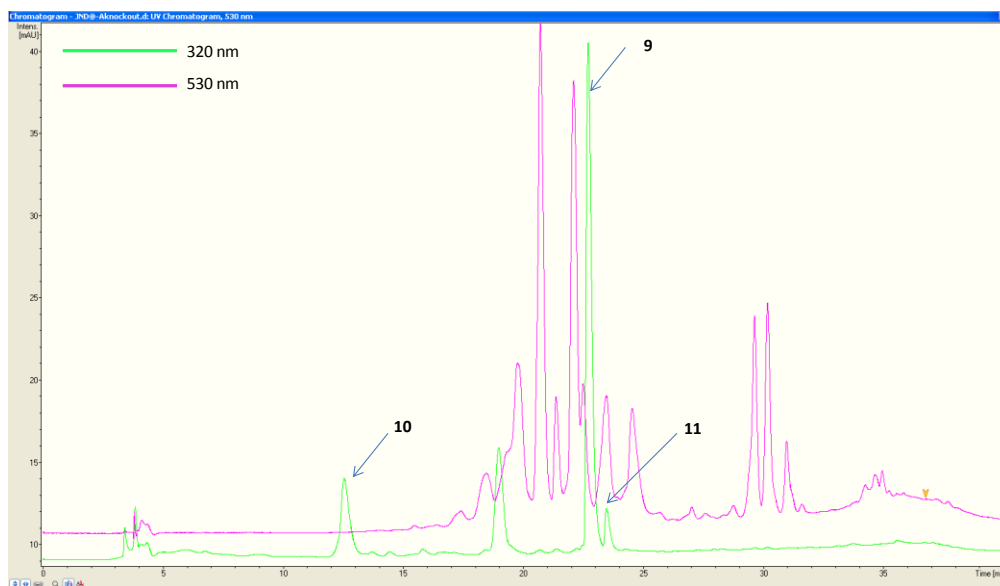

**Figure S10b.** LC-UV/MS profile of *S. venezuelae* JND2ΔA. For LC gradient used, please refer to Table S10.



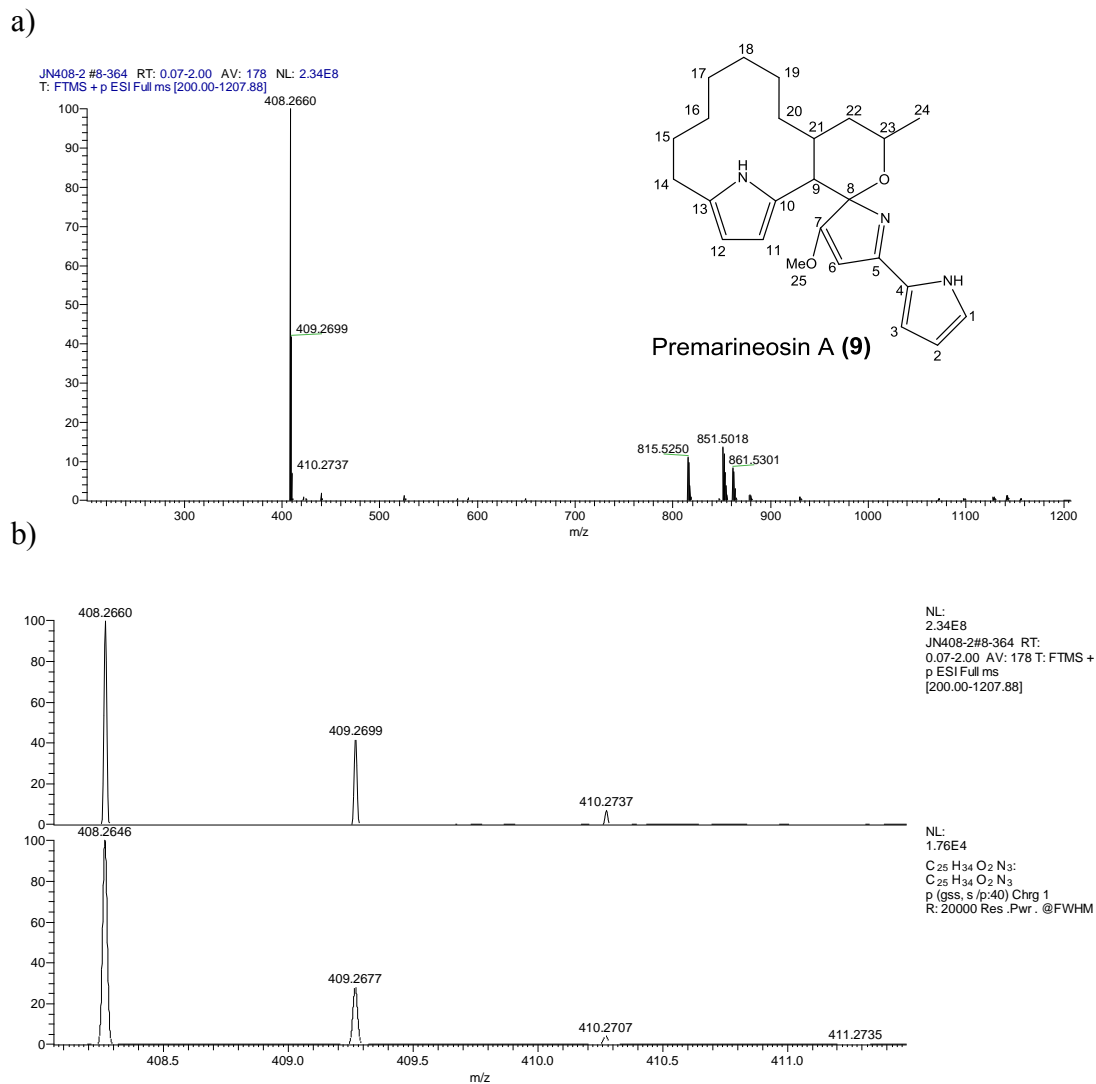

**Figure S11.** a) HRMS (ESI) of Premarinesosin A (9) b) Comparison between the acquired (top panel) and predicted (bottom panel) mass for premarinesosin A (9). There is a difference of  $m/z$  0.0014 between acquired and predicted mass.

a)

JN408-2 #6-363 RT: 0.04-1.99 AV: 179 NL: 6.44E5  
F: ITMS + p ESI Full ms2 408.26@cid20.00 [110.00-

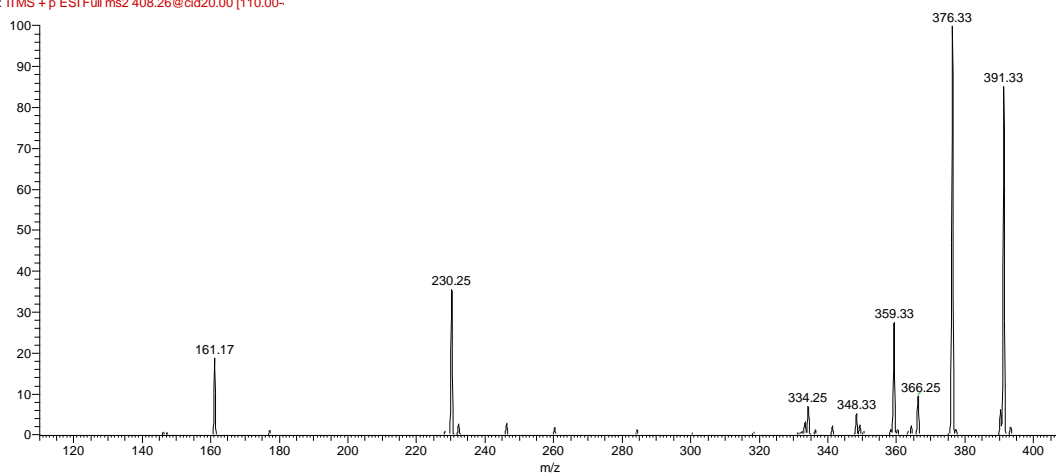

b)

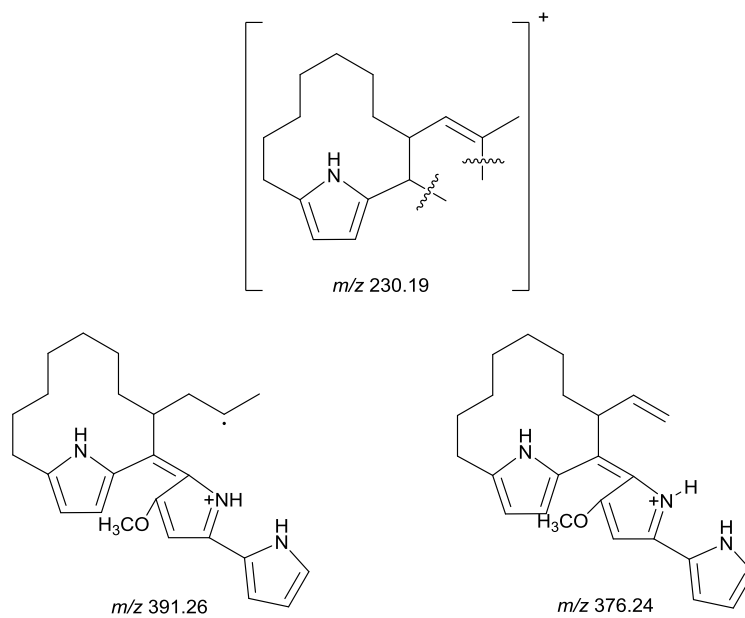

**Figure S12.** a) ESI-CID-MS<sup>n</sup> profile of premarineosin A (9). The MS/MS profile of Premarineosin A (9) is characterized by the presence of  $m/z$  230.25, 376.33 and 391.33 daughter ion fragments. Parent ion of  $m/z$  408.26 is not shown. b) Proposed structures of ion fragments shown in ESI-CID-MS<sup>n</sup> profile of premarineosin A (9).

a)

JN422 #8-358 RT: 0.07-1.99 AV: 175 NL: 2.10E8  
T: FTMS + p ESI Full ms [200.00-1207.88]

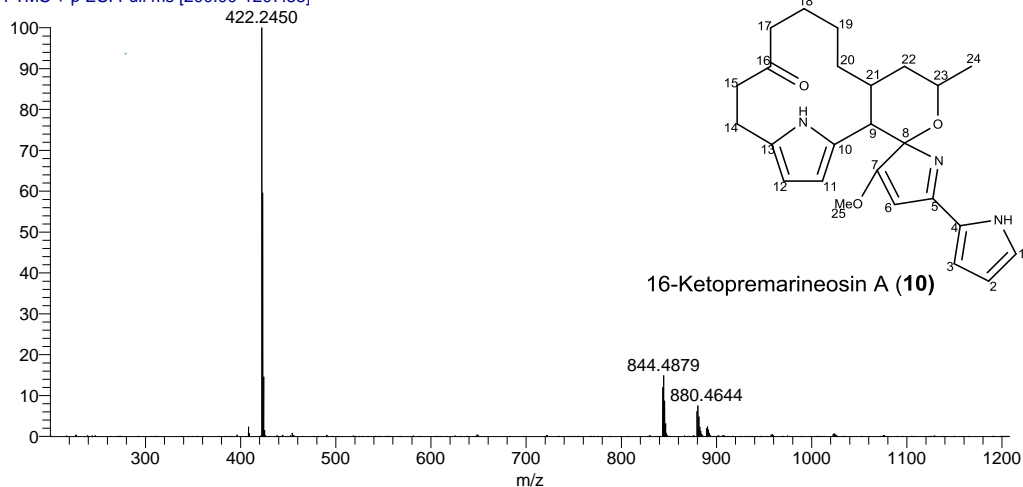

b)

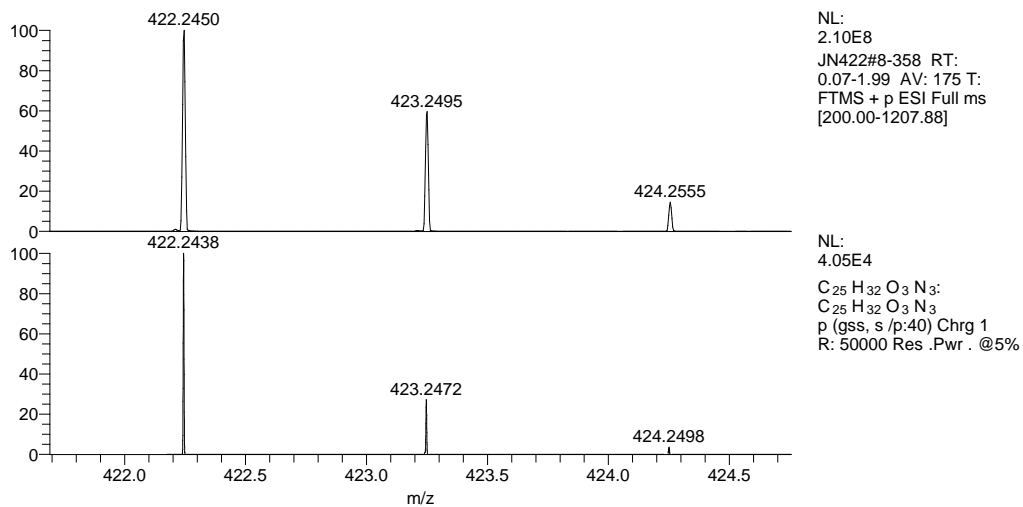

**Figure S13.** a) HRMS (ESI) of 16-ketopremarinesin A (10) b) Comparison between the acquired (top panel) and predicted (bottom panel) mass for 16-ketopremarinesin A (10). There is a difference of  $m/z$  0.0012 between acquired and predicted mass.

a)

JN422 #1-357 RT: 0.01-1.98 AV: 178 NL: 6.43E5  
 F: ITMS + p ESI Full ms 2 422.24@cid20.00 [115.00-

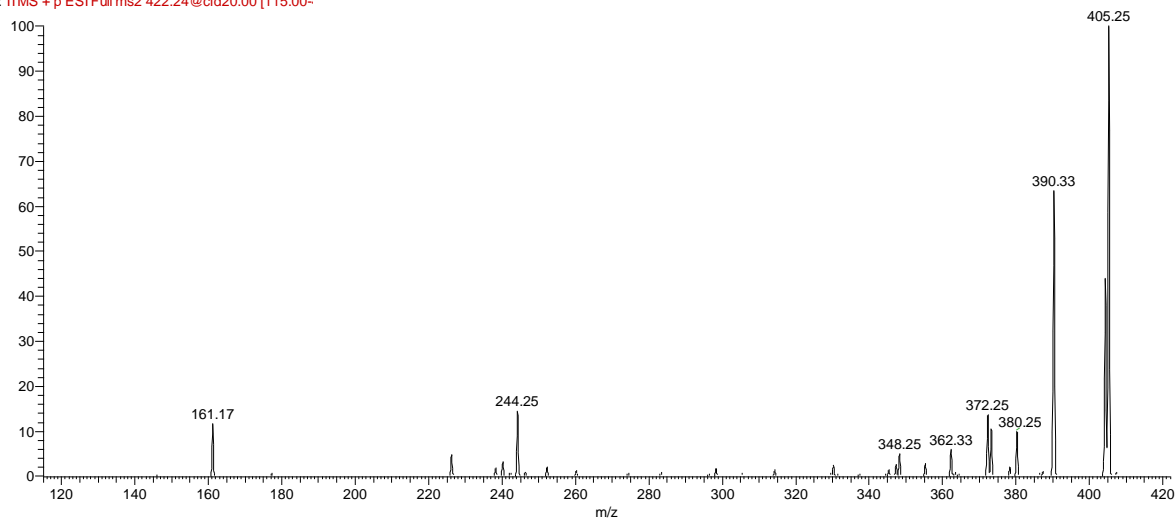

b)

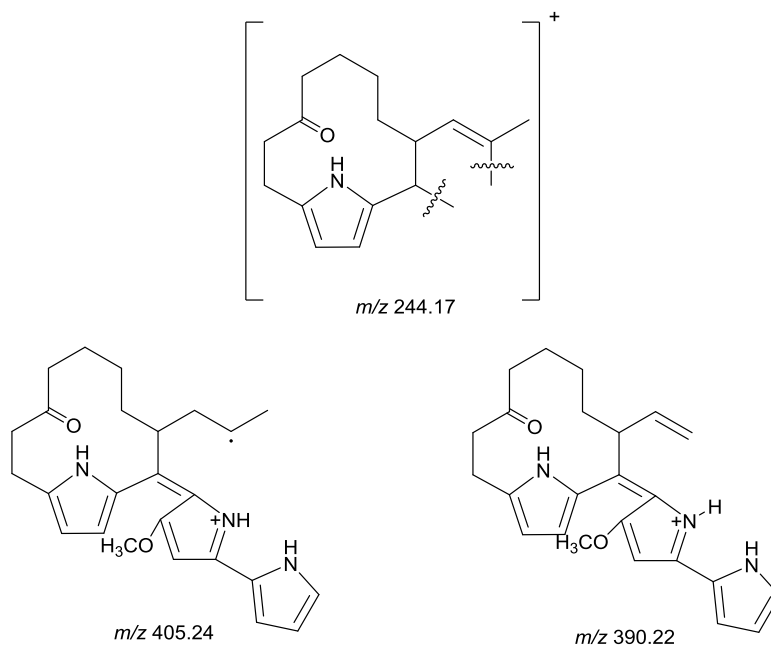

**Figure S14.** a) ESI-CID-MS<sup>n</sup> profile of 16-ketopremarinesin A (**10**). The MS/MS profile of **10** is characterized by the presence of  $m/z$  244.25, 390.33 and 405.25 daughter ion fragments. Parent ion of  $m/z$  422.24 is not shown. b) Proposed structures of ion fragments shown in ESI-CID-MS<sup>n</sup> profile of 16-ketopremarinesin A (**10**).

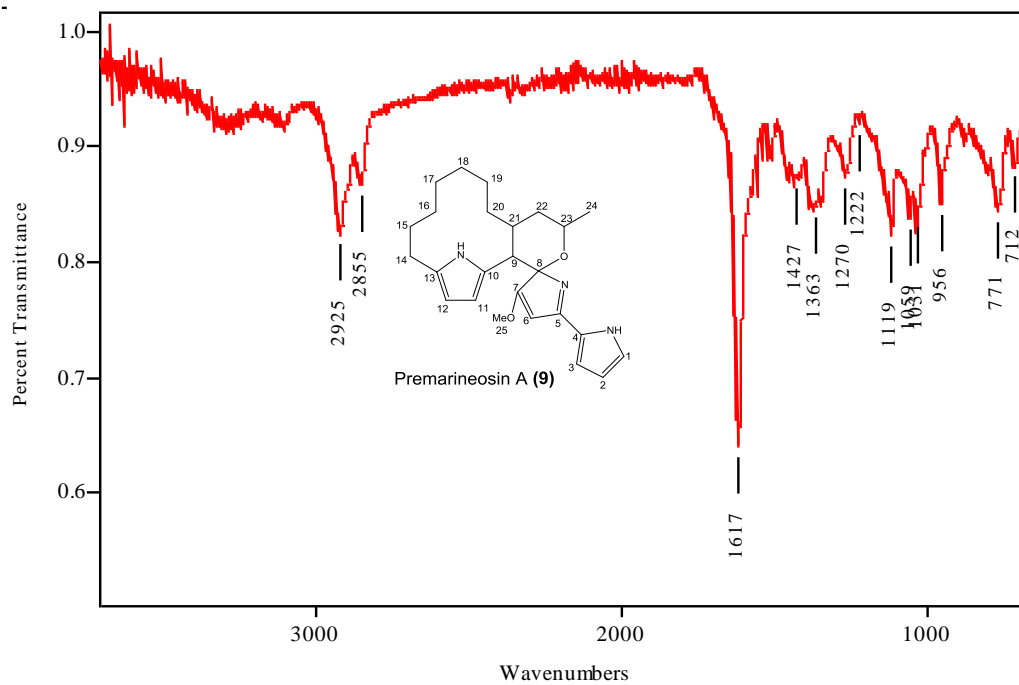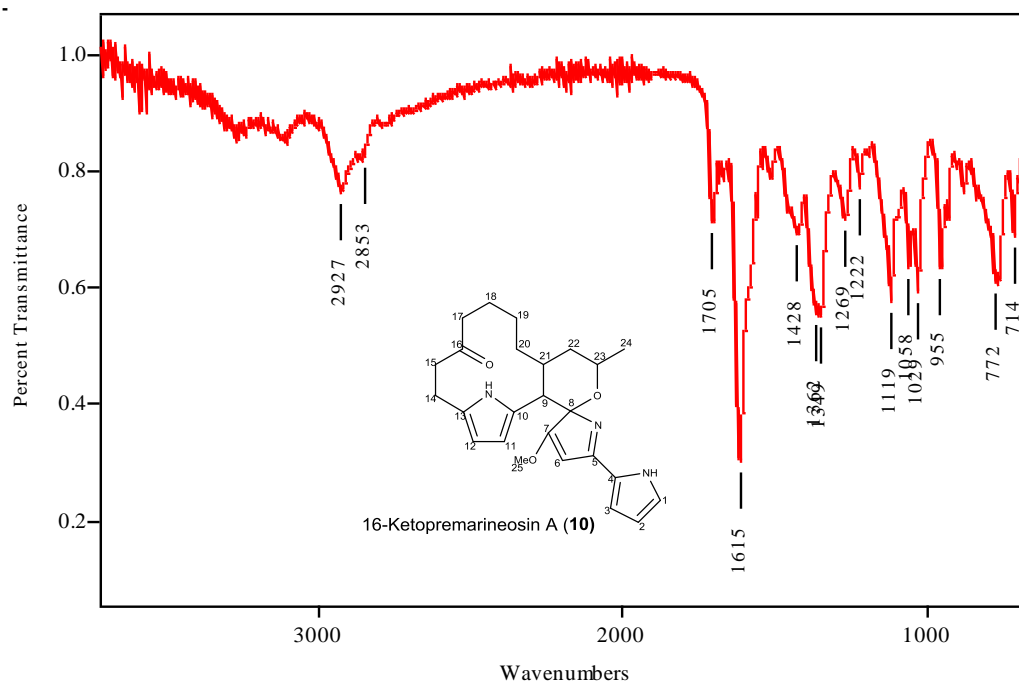

Figure S15. IR spectrum of **9** (top panel) and **10** (bottom panel)

JN408-proton-16scans

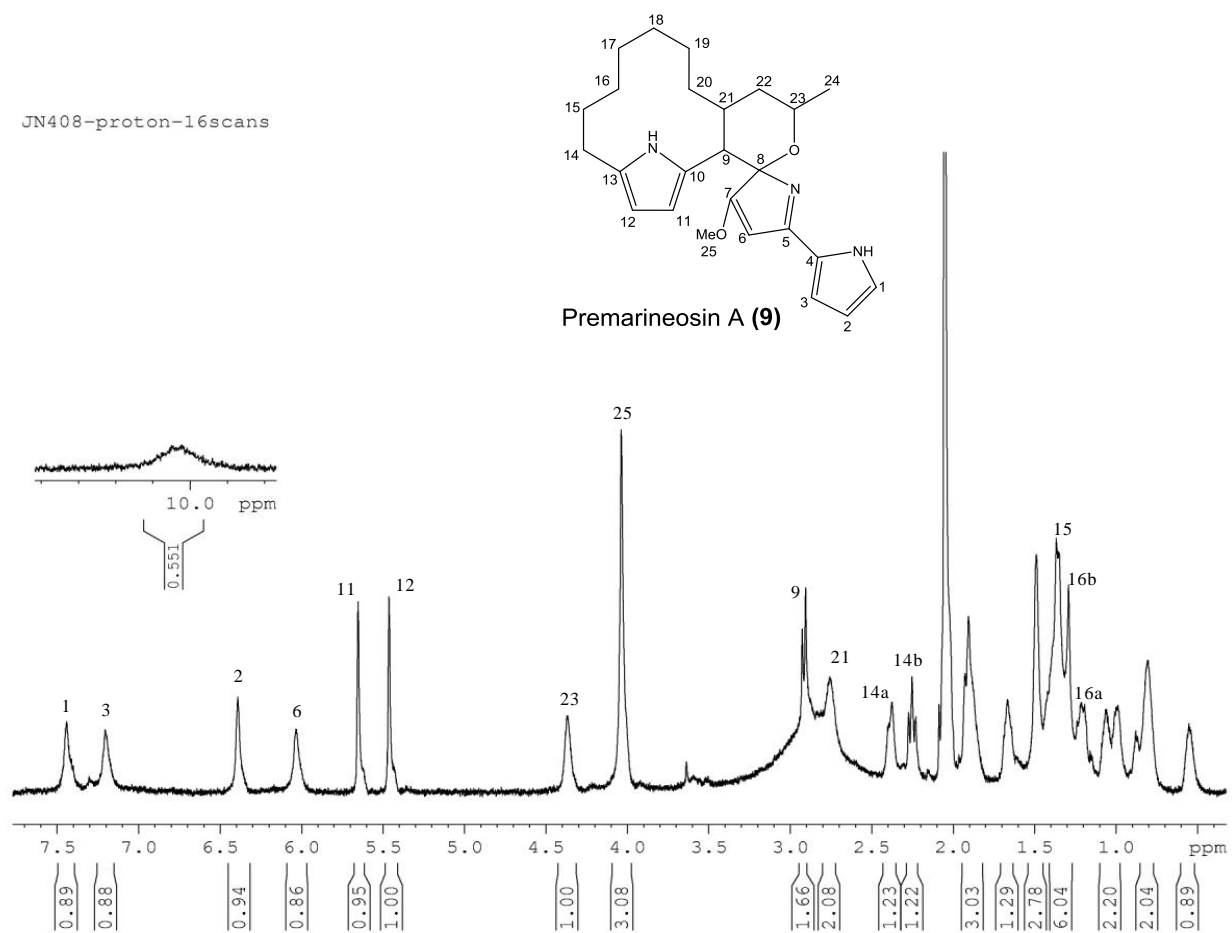

Figure S16. <sup>1</sup>H NMR spectrum of premarineosin A (9) (600 MHz, Acetone-d<sub>6</sub>)

JN422-64scans-nonspin

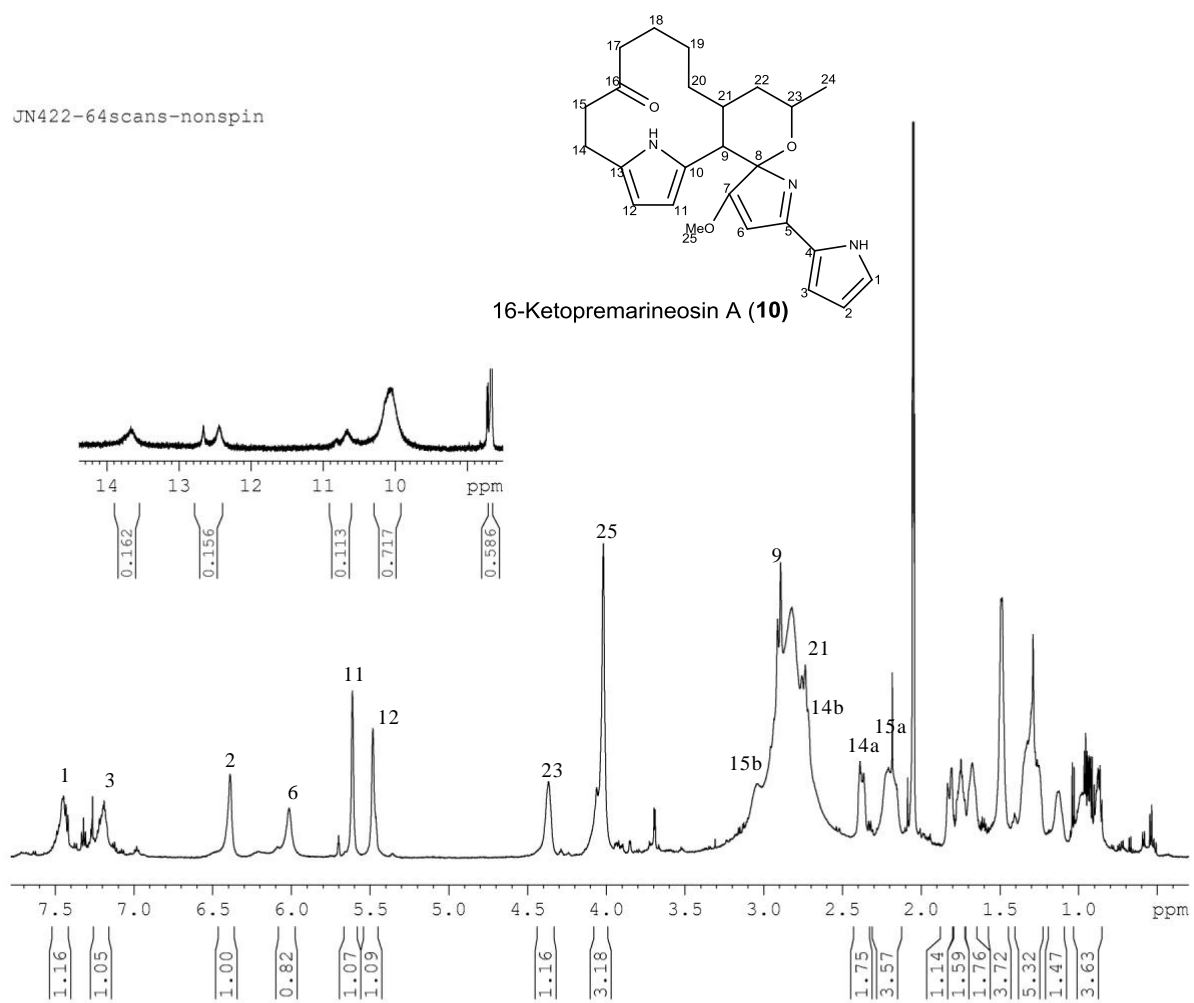

Figure S17. <sup>1</sup>H NMR spectrum of 16-ketopremarinesin A (10) (600 MHz, Acetone-d<sub>6</sub>)

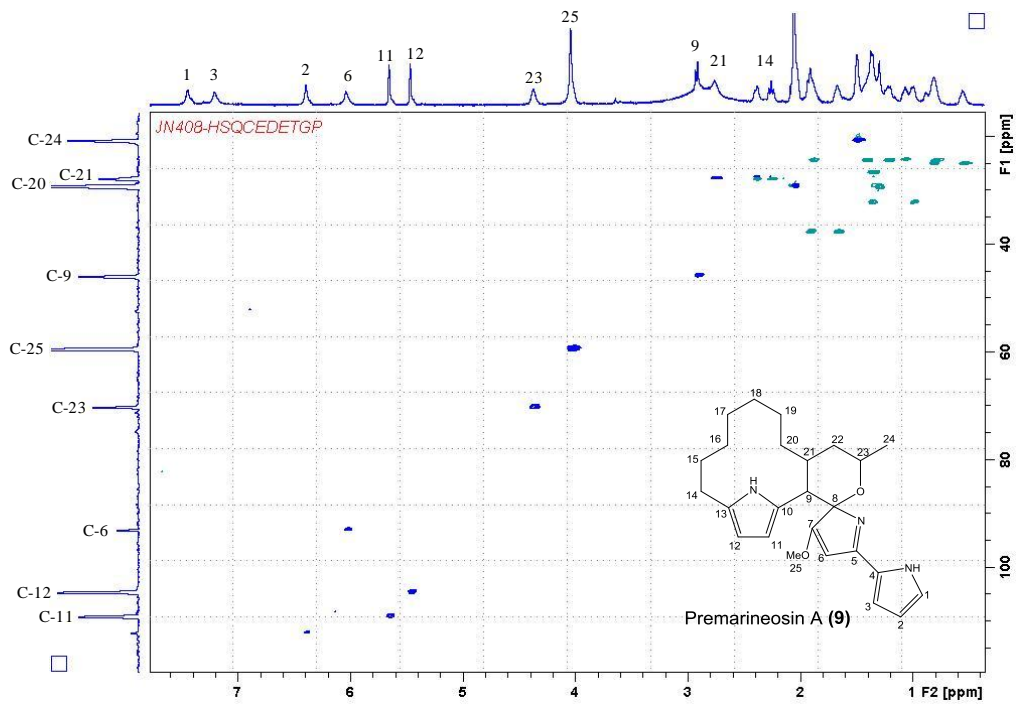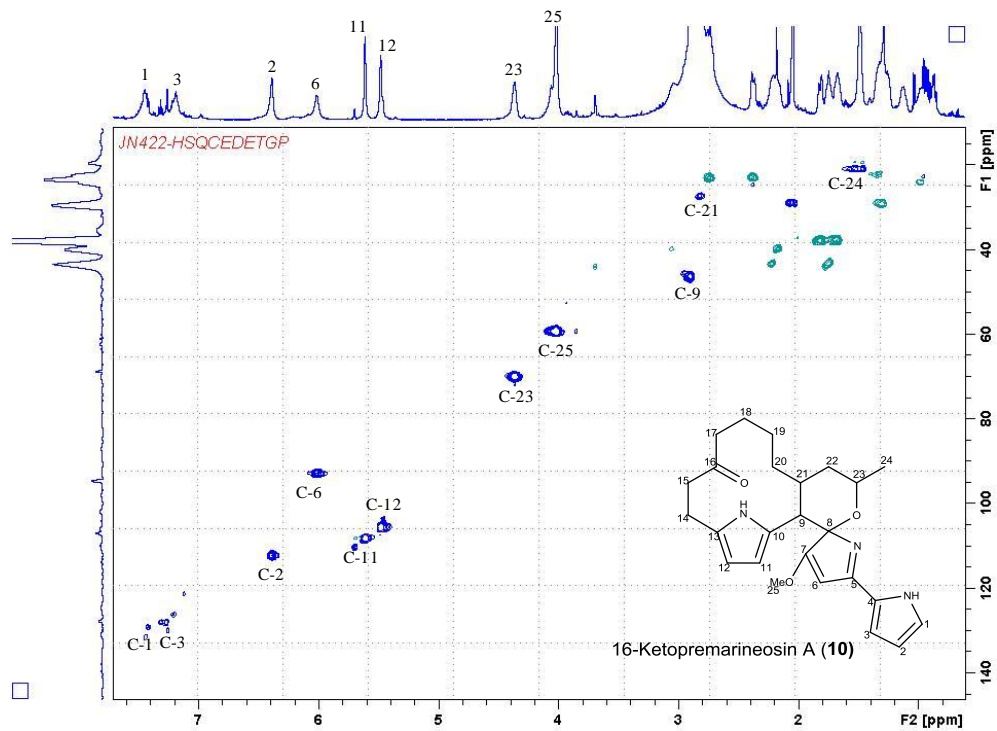

Figure S18. 2D HSQC ( $^1\text{H} \rightarrow ^{13}\text{C}$ ) spectrum of 9 (top panel) and 10 (bottom panel). Key peak assignments are indicated on spectra



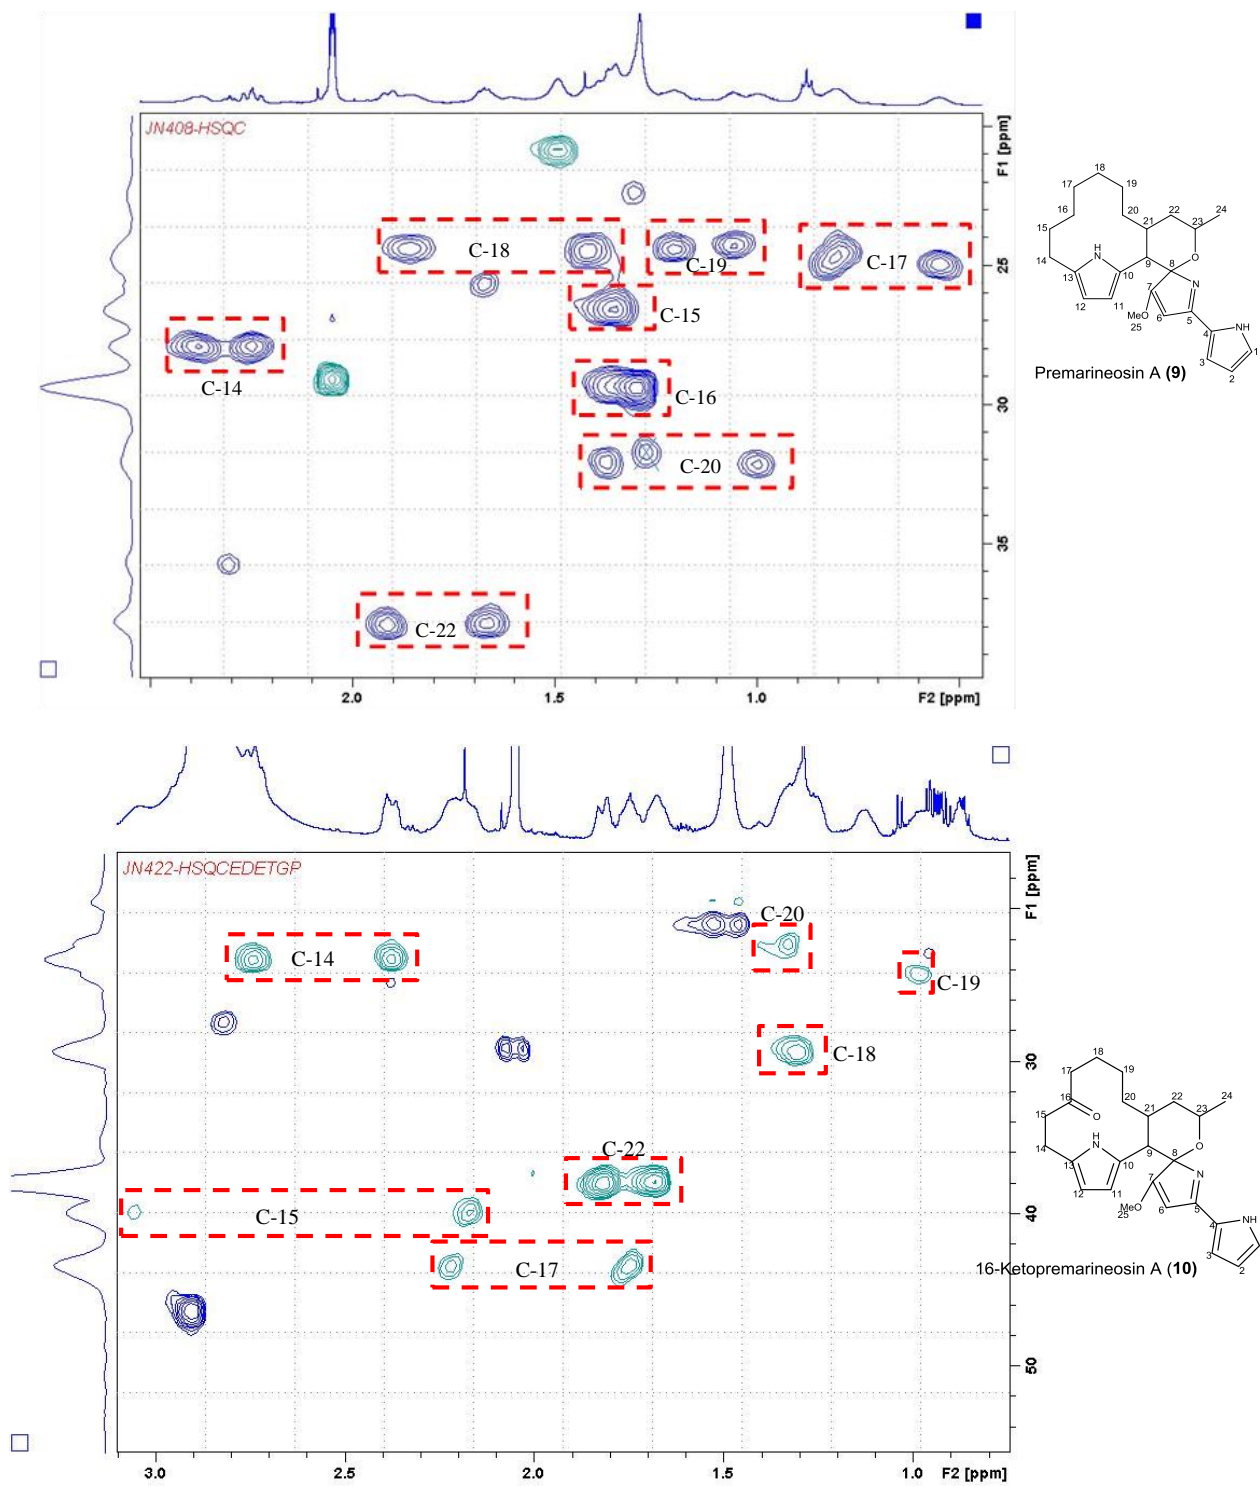

Figure S19. 2D HSQC ( $^1\text{H} \rightarrow ^{13}\text{C}$ ) spectrum of 9 (top panel) and 10 (bottom panel) - aliphatic region expanded

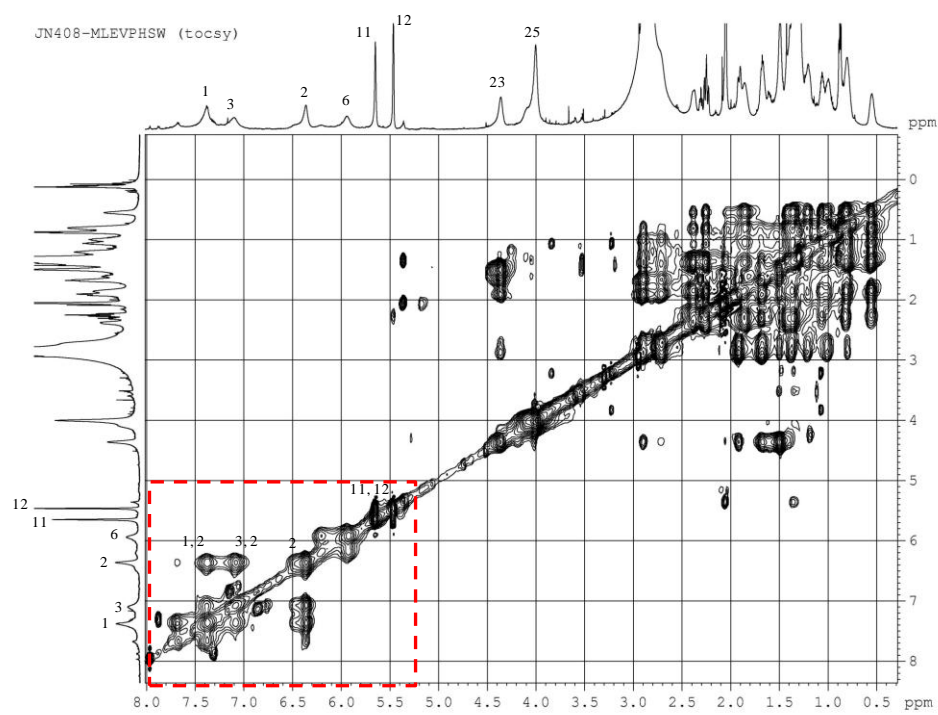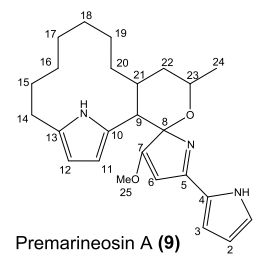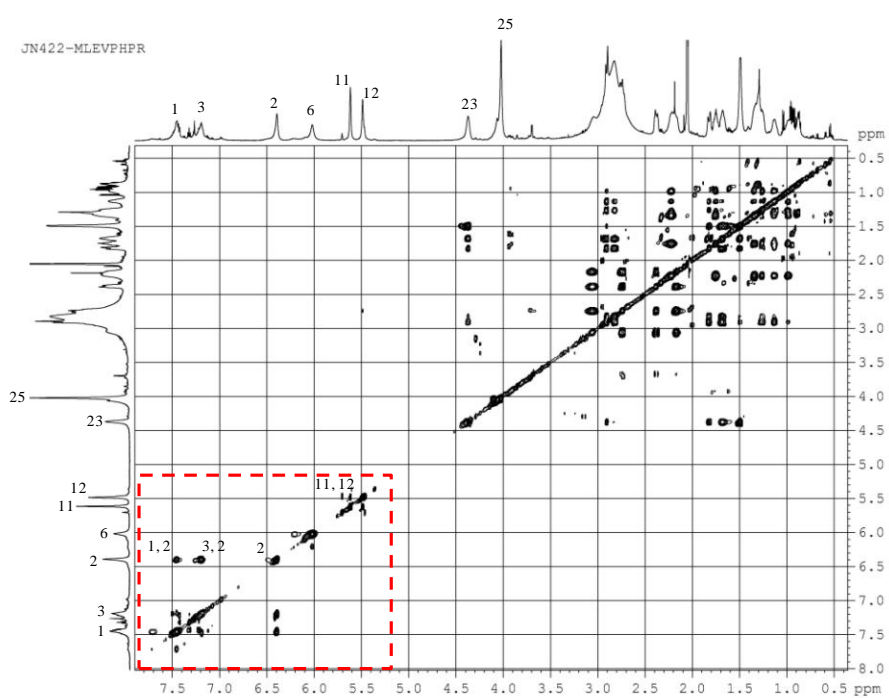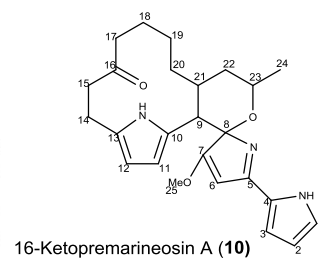

Figure S20. 2D TOCSY ( $^1\text{H} \leftrightarrow ^1\text{H}$ ) spectrum of 9 (top panel) and 10 (bottom panel)

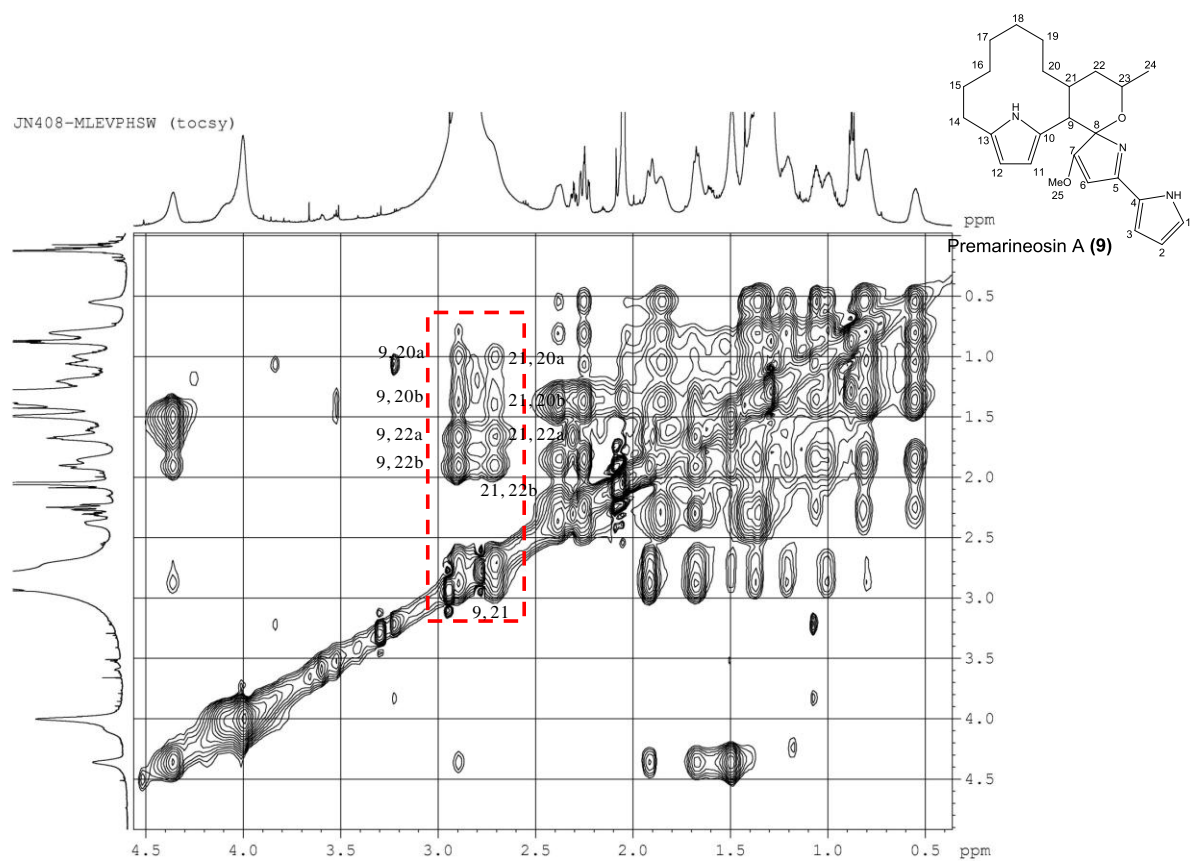

Figure S21. Selected 2D TOCSY ( $^1\text{H} \leftrightarrow ^1\text{H}$ ) spectrum of **9** (aliphatic region expanded)

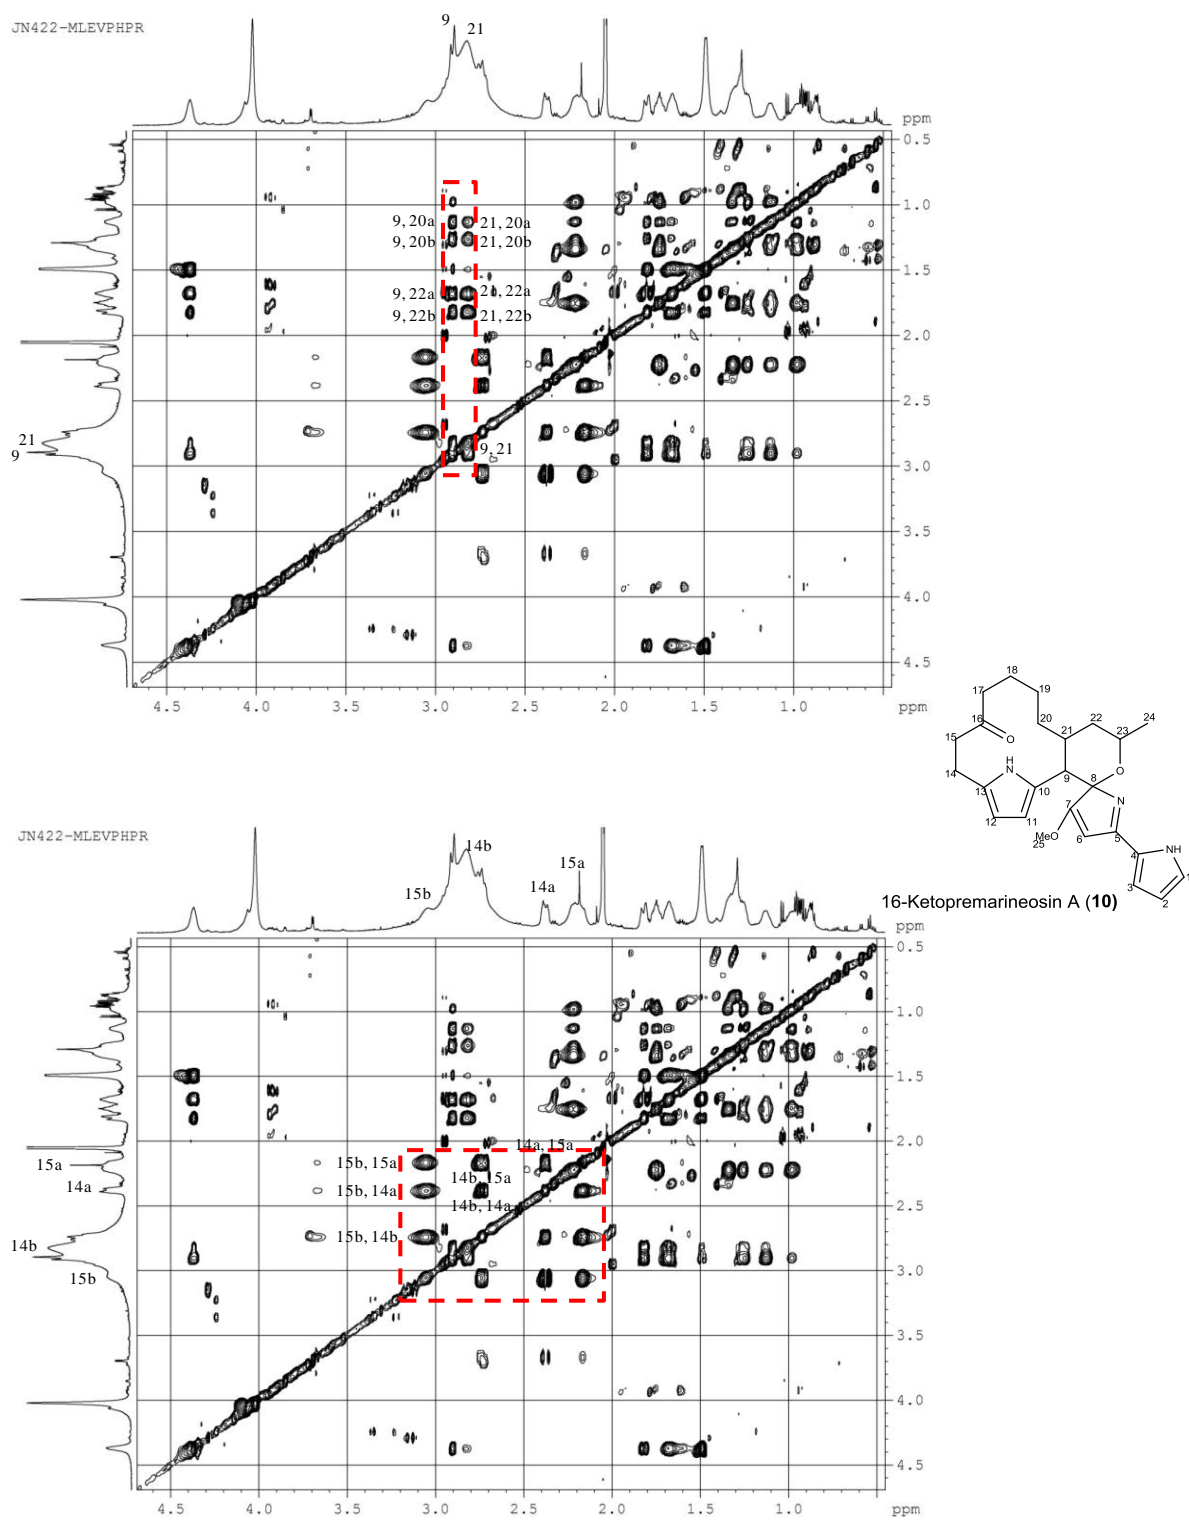

Figure S22. Selected 2D TOCSY ( $^1\text{H} \leftrightarrow ^1\text{H}$ ) spectrum of **10** (aliphatic region expanded)

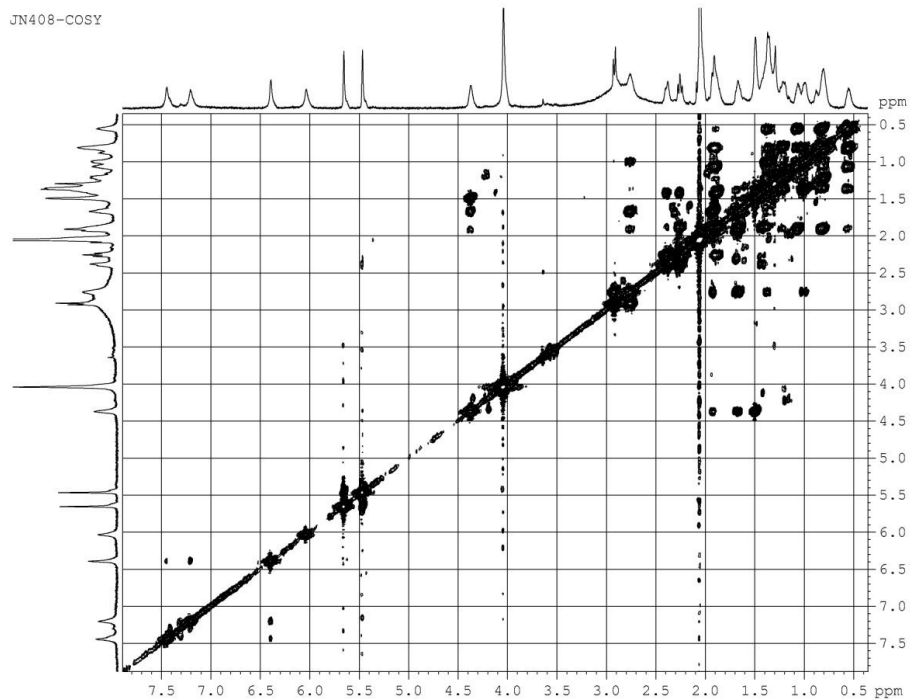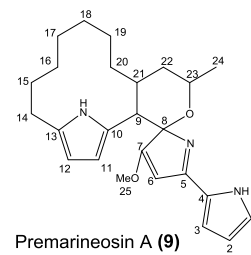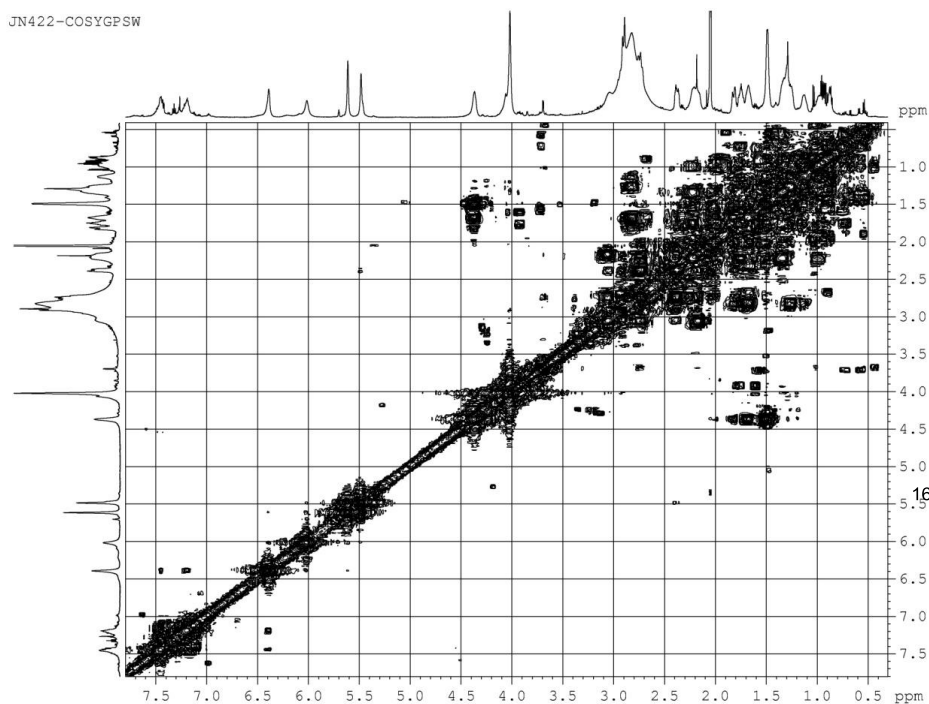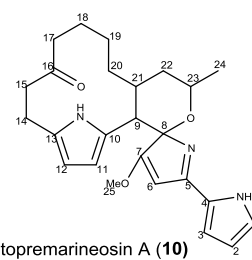

Figure S23. 2D COSY ( $^1\text{H} \leftrightarrow ^1\text{H}$ ) spectrum of **9** (top panel) and **10** (bottom panel)

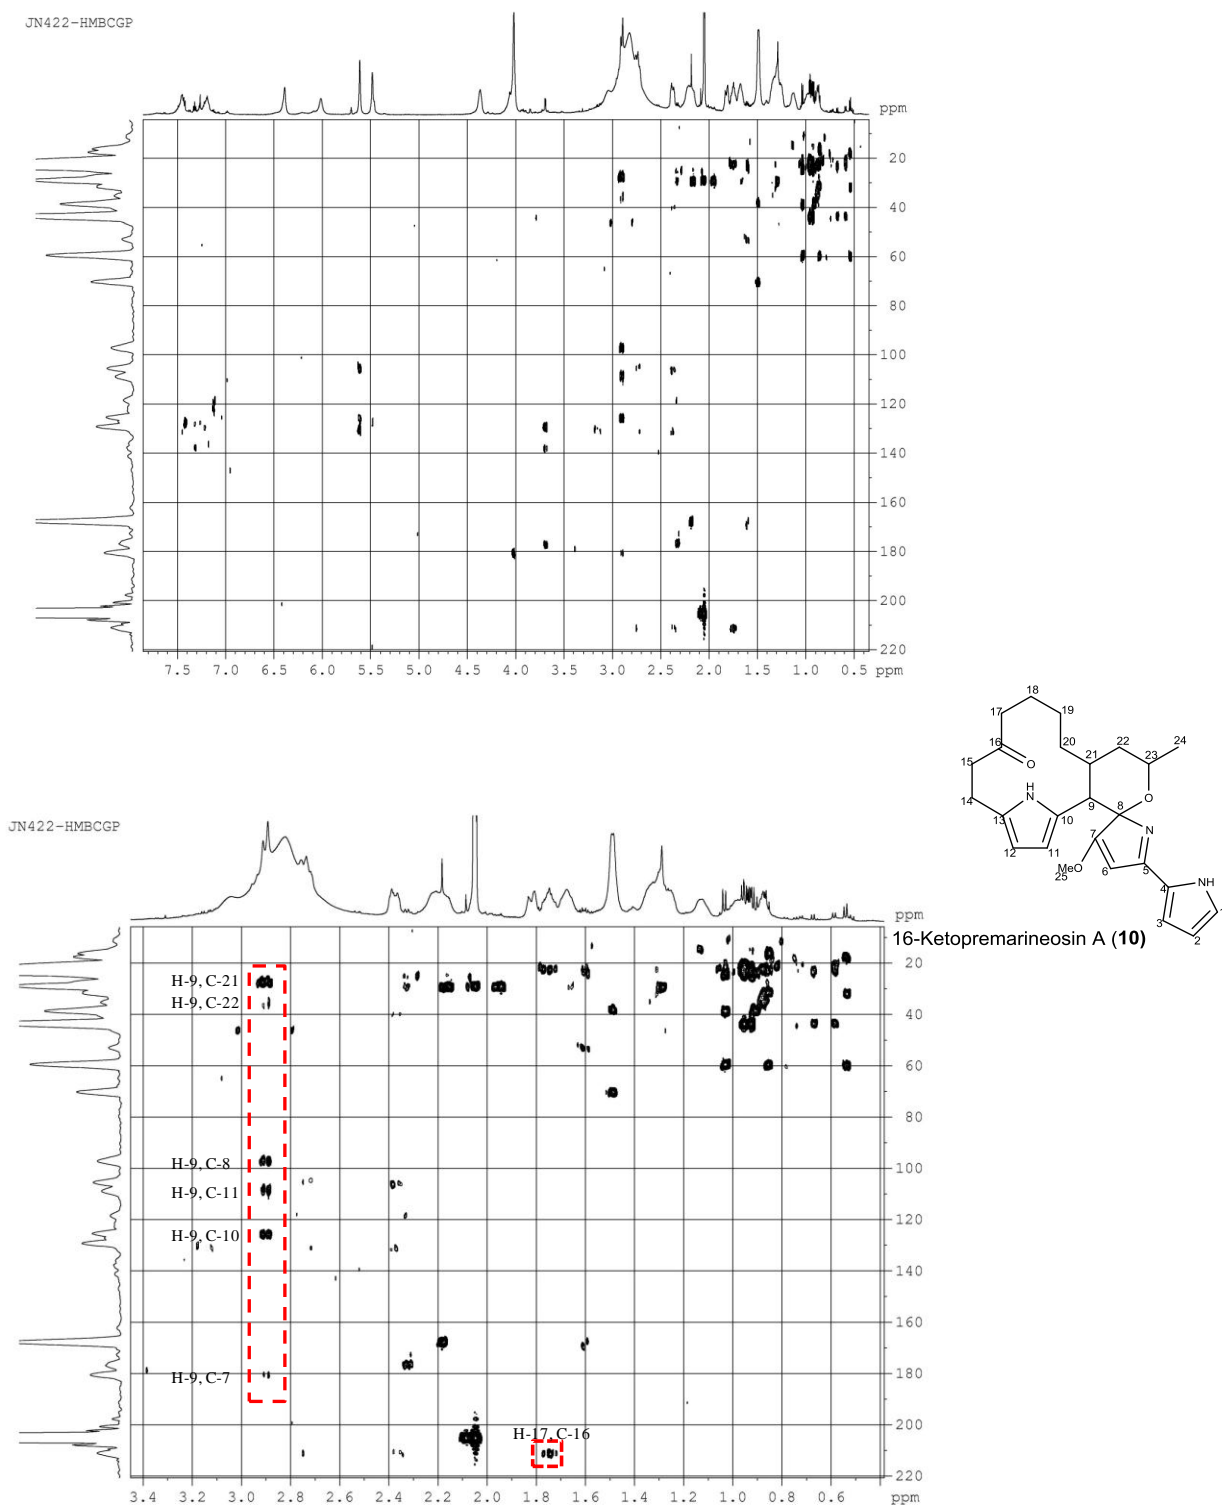

Figure S24. 2D HMBC ( $^1\text{H} \rightarrow ^{13}\text{C}$ ) spectrum of 10 (top panel), aliphatic region expanded (bottom panel)

**Table S11.** Selected COSY ( $^1\text{H}\leftrightarrow^1\text{H}$ ) and TOCSY ( $^1\text{H}\leftrightarrow^1\text{H}$ ) NMR correlations for **9**

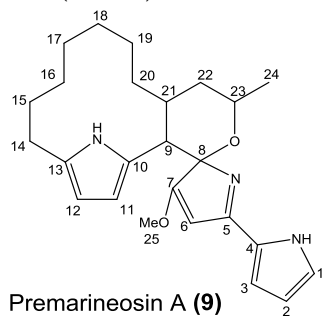

| Position | $\delta_{\text{H}}$ (J in Hz) <sup>a</sup> | COSY      | TOCSY                 |
|----------|--------------------------------------------|-----------|-----------------------|
| 1        | 7.37, brs                                  | 2, 3      | 2, 3                  |
| 2        | 6.37, brs                                  | 1, 3      | 1, 3                  |
| 3        | 7.08, brs                                  | 1, 2      | 1, 2                  |
| 4        |                                            |           |                       |
| 5        |                                            |           |                       |
| 6        | 5.93, s                                    |           |                       |
| 7        |                                            |           |                       |
| 8        |                                            |           |                       |
| 9        | 2.89, d (6.9)                              | 21        | 20, 21, 22, 23, 24    |
| 10       |                                            |           |                       |
| 11       | 5.64, brs                                  | 12        | 12                    |
| 12       | 5.46, brs                                  | 11        | 11                    |
| 13       |                                            |           |                       |
| 14       | 2.24, 2.37, m                              | 15        | 15, 16, 17            |
| 15       | 1.37, m                                    | 14, 17    | 14, 16, 17, 18        |
| 16       | 1.34, 1.37, m                              | 15, 18    | 14, 15, 17, 18, 19    |
| 17       | 0.54, 0.80, m                              | 16, 18    | 15, 16, 18, 19, 20    |
| 18       | 1.42, 1.86, m                              | 17, 19    | 15, 16, 17, 19, 20    |
| 19       | 1.05, 1.20, m                              | 18, 20    | 16, 17, 18, 20, 21    |
| 20       | 1.00, 1.37, m                              | 19, 21    | 9, 17, 18, 19, 21, 22 |
| 21       | 2.71, m                                    | 9, 20, 22 | 9, 19, 20, 22, 23, 24 |
| 22       | 1.67, 1.91, m                              | 21, 23    | 9, 20, 21, 23, 24     |
| 23       | 4.36, m                                    | 22, 24    | 9, 20, 21, 22, 24     |
| 24       | 1.50, d (6.5)                              | 23        | 9, 21, 22, 23         |
| 25       | 3.99, s                                    |           |                       |

<sup>a</sup> Coupling constants were not determined for aromatic protons due to brs

Table S12. Selected COSY ( $^1\text{H}\leftrightarrow^1\text{H}$ ) and TOCSY ( $^1\text{H}\leftrightarrow^1\text{H}$ ) NMR correlations for **10**

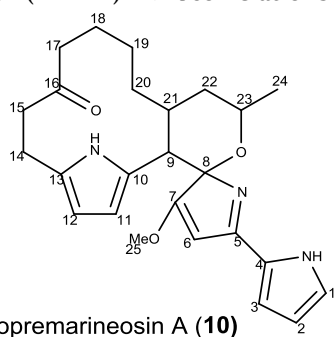

| Position | $\delta_{\text{H}}$ (J in Hz) <sup>a</sup> | COSY      | TOCSY                 |
|----------|--------------------------------------------|-----------|-----------------------|
| 1        | 7.45, brs                                  | 2, 3      | 2, 3                  |
| 2        | 6.39, brs                                  | 1, 3      | 1, 3                  |
| 3        | 7.20, brs                                  | 1, 2      | 1, 2                  |
| 4        |                                            |           |                       |
| 5        |                                            |           |                       |
| 6        | 6.01, s                                    |           |                       |
| 7        |                                            |           |                       |
| 8        |                                            |           |                       |
| 9        | 2.90, d (7.1)                              | 21        | 20, 21, 22, 23, 24    |
| 10       |                                            |           |                       |
| 11       | 5.61, brs                                  | 12        | 12                    |
| 12       | 5.48, brs                                  | 11        | 11                    |
| 13       |                                            |           |                       |
| 14       | 2.37, 2.73, m                              | 15        | 15                    |
| 15       | 2.16, 3.05, m                              | 14        | 14                    |
| 16       |                                            |           |                       |
| 17       | 1.71, 2.21, m                              | 18        | 18, 19, 20            |
| 18       | 1.29, 1.31, m                              | 17, 19    | 17, 19, 20            |
| 19       | 0.94, 1.33, m                              | 18, 20    | 17, 18, 20, 21        |
| 20       | 1.12, 1.26, m                              | 19, 21    | 9, 17, 18, 19, 21, 22 |
| 21       | 2.80, m                                    | 9, 20, 22 | 9, 19, 20, 22, 23, 24 |
| 22       | 1.67, 1.82, m                              | 21, 23    | 9, 20, 21, 23, 24     |
| 23       | 4.36, m                                    | 22, 24    | 9, 20, 21, 22, 24     |
| 24       | 1.50, d (6.7)                              | 23        | 9, 21, 22, 23         |
| 25       | 4.02, s                                    |           |                       |

<sup>a</sup> Coupling constants were not determined for aromatic protons due to brs



Table S13. NMR Spectral data for **10** (600 MHz, Acetone-d<sub>6</sub>) and Selected HMBC correlations

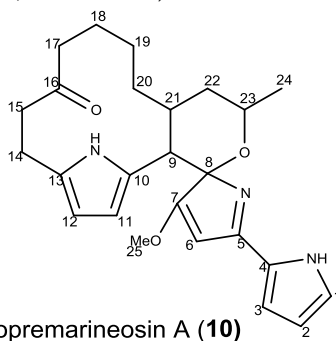

| Position | $\delta_{\text{H}}$ ( <i>J</i> in Hz) | $\delta_{\text{C}}$ <sup>a</sup> | Selected HMBC correlations |                          |
|----------|---------------------------------------|----------------------------------|----------------------------|--------------------------|
| 1        | 7.45, brs                             | 131.5                            | CH                         |                          |
| 2        | 6.39, brs                             | 112.4                            | CH                         |                          |
| 3        | 7.20, brs                             | 125.9                            | CH                         |                          |
| 4        |                                       | N.D.                             | C                          |                          |
| 5        |                                       | N.D.                             | C                          |                          |
| 6        | 6.01, s                               | 93.1                             | CH                         |                          |
| 7        |                                       | 180.6                            | C                          |                          |
| 8        |                                       | 97.4                             | C                          |                          |
| 9        | 2.90, d (7.1)                         | 46.3                             | CH                         | 7, 8, 10, 11, 20, 21, 22 |
| 10       |                                       | 125.7                            | C                          |                          |
| 11       | 5.61, brs                             | 108.3                            | CH                         | 10, 12, 13               |
| 12       | 5.48, brs                             | 105.5                            | CH                         | 10, 13                   |
| 13       |                                       | 130.1                            | C                          |                          |
| 14       | 2.37, 2.73, m                         | 23.6                             | CH <sub>2</sub>            | 12, 13, 15, 16           |
| 15       | 2.16, 3.05, m                         | 39.9                             | CH <sub>2</sub>            |                          |
| 16       |                                       | 211.3                            | C=O                        |                          |
| 17       | 1.71, 2.21, m                         | 43.6                             | CH <sub>2</sub>            | 16, 19                   |
| 18       | 1.29, 1.31, m                         | 29.4                             | CH <sub>2</sub>            | 19, 20                   |
| 19       | 0.94, 1.33, m                         | 22.1                             | CH <sub>2</sub>            | 18                       |
| 20       | 1.12, 1.26, m                         | 34.7                             | CH <sub>2</sub>            | 9                        |
| 21       | 2.80, m                               | 27.3                             | CH                         |                          |
| 22       | 1.67, 1.82, m                         | 37.9                             | CH <sub>2</sub>            |                          |
| 23       | 4.36, m                               | 70.0                             | CH                         |                          |
| 24       | 1.50, d (6.7)                         | 20.6                             | CH <sub>3</sub>            | 22, 23                   |
| 25       | 4.02, s                               | 59.4                             | CH <sub>3</sub>            | 7                        |

<sup>a</sup> Assignment by 1D (<sup>1</sup>H), and 2D (COSY, TOCSY, HSQC) NMR spectroscopy; N.D.: not determined.

**Table S14. Comparison of NMR Spectral data for 9 and 10 (600 MHz, Acetone-d6)**

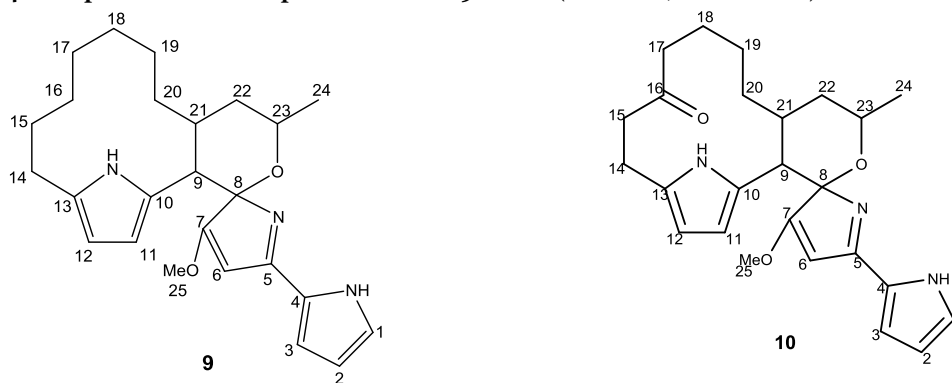

| Position | <b>9</b><br>$\delta_{\text{H}}^{\text{a}}$ | <b>10</b><br>$\delta_{\text{H}}$ | <b>9</b><br>$\delta_{\text{C}}^{\text{a}}$ | <b>10</b><br>$\delta_{\text{C}}$ |
|----------|--------------------------------------------|----------------------------------|--------------------------------------------|----------------------------------|
| 1        | 7.37                                       | 7.45                             | 131.3                                      | 131.5                            |
| 2        | 6.37                                       | 6.39                             | 111.6                                      | 112.4                            |
| 3        | 7.08                                       | 7.20                             | 127.5                                      | 125.9                            |
| 4        |                                            |                                  | N.D.                                       | N.D.                             |
| 5        |                                            |                                  | N.D.                                       | N.D.                             |
| 6        | 5.93                                       | 6.01                             | 93.1                                       | 93.1                             |
| 7        |                                            |                                  | N.D.                                       | 180.6                            |
| 8        |                                            |                                  | N.D.                                       | 97.4                             |
| 9        | 2.89                                       | 2.90                             | 46.1                                       | 46.3                             |
| 10       |                                            |                                  | N.D.                                       | 125.7                            |
| 11       | 5.64                                       | 5.61                             | 109.0                                      | 108.3                            |
| 12       | 5.46                                       | 5.48                             | 104.5                                      | 105.5                            |
| 13       |                                            |                                  | N.D.                                       | 130.1                            |
| 14       | 2.24, 2.37                                 | 2.37, 2.73                       | 28.0                                       | 23.6                             |
| 15       | 1.37                                       | 2.16, 3.05                       | 26.5                                       | 39.9                             |
| 16       | 1.34, 1.37                                 |                                  | 29.3                                       | 211.3                            |
| 17       | 0.54, 0.80                                 | 1.71, 2.21                       | 24.7                                       | 43.6                             |
| 18       | 1.42, 1.86                                 | 1.29, 1.31                       | 24.4                                       | 29.4                             |
| 19       | 1.05, 1.20                                 | 0.94, 1.33                       | 24.3                                       | 22.1                             |
| 20       | 1.00, 1.37                                 | 1.12, 1.26                       | 31.9                                       | 34.7                             |
| 21       | 2.71                                       | 2.80                             | 28.1                                       | 27.3                             |
| 22       | 1.67, 1.91                                 | 1.67, 1.82                       | 37.8                                       | 37.9                             |
| 23       | 4.36                                       | 4.36                             | 70.1                                       | 70.0                             |
| 24       | 1.50                                       | 1.50                             | 20.9                                       | 20.6                             |
| 25       | 3.99                                       | 4.02                             | 59.1                                       | 59.4                             |

<sup>a</sup> Assignment by 1D (<sup>1</sup>H), and 2D (COSY, TOCSY, HSQC) NMR spectroscopy; N.D.: not determined.

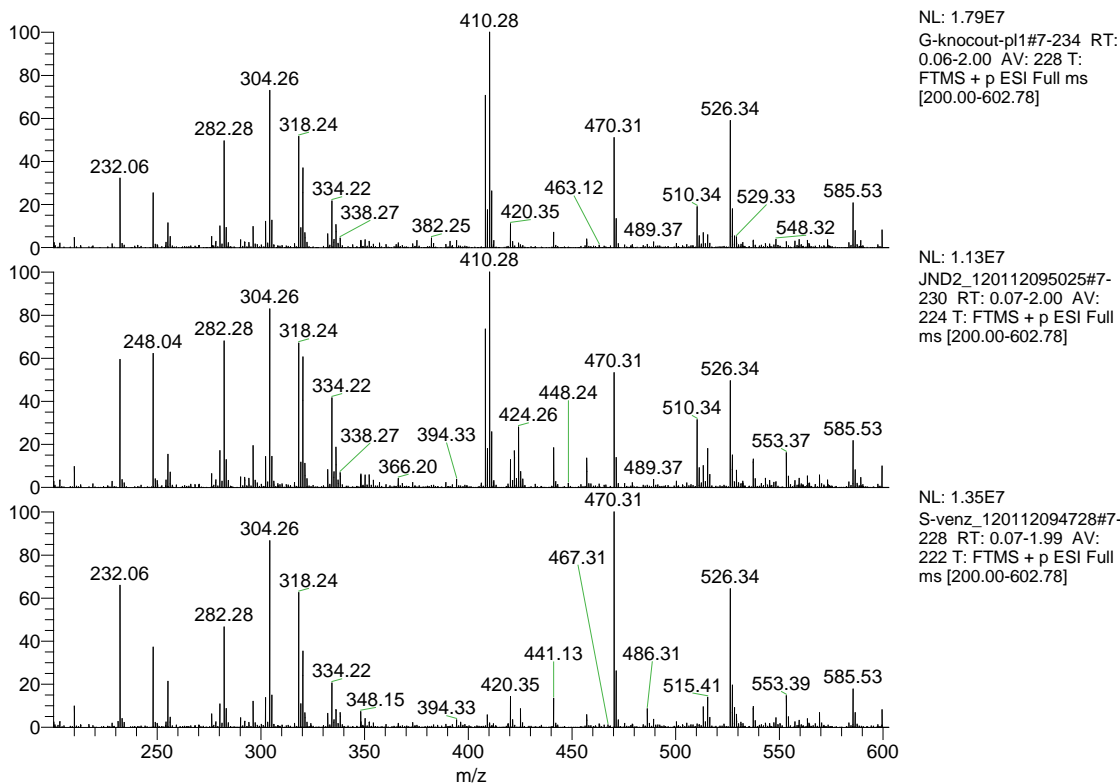

**Figure S25. Comparison of the MS profiles of crude extract of *S. venezuelae* JND2ΔG (top panel), JND2 strain (middle) and wild type *S. venezuelae* (bottom).** JND2ΔG (top panel) and JND2 (middle panel) strains have the same MS profile where both strains show a compound of  $m/z$  410.28 in addition to the metabolites normally produced by the wild type *S. venezuelae* (bottom) such as methymycin and pikromycin,  $m/z$  470.31 and 526.34 respectively.

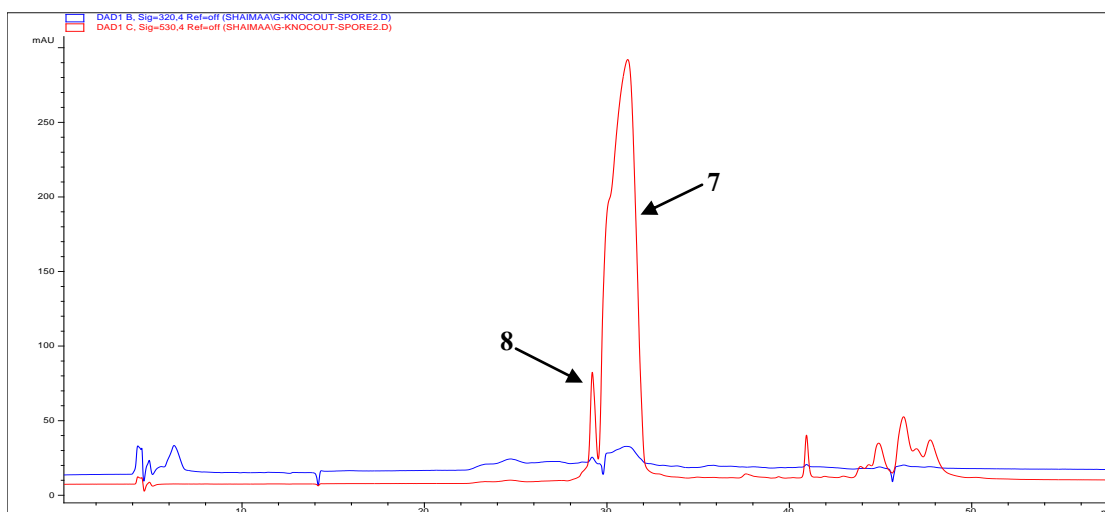

**Figure S26. LC-UV/MS profile of *S. venezuelae* JND2ΔG.** The red chromatogram represents absorption at 530 nm while blue chromatogram represents absorption at 320 nm. For LC method used, please refer to Table S8.

a)

G410-pure #10-238 RT: 0.10-2.00 AV: 114 NL: 7.00E6  
T: FTMS + p ESI Full ms [200.00-1207.88]

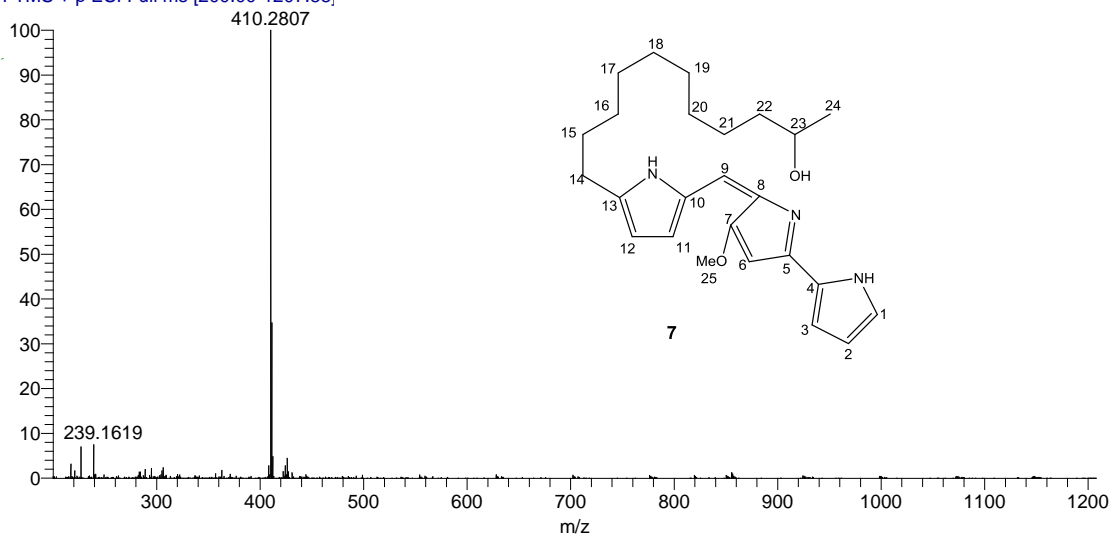

b)

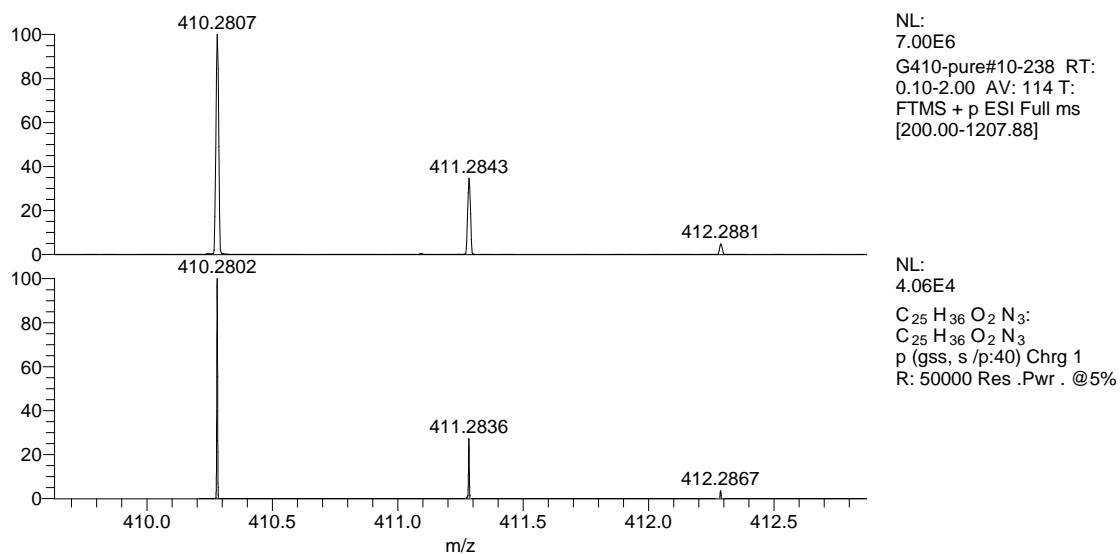

Figure S27. a) HRMS (ESI) 23-hydroxyundecylprodiginine (7). b) Comparison between the acquired (top panel) and predicted (bottom panel) mass for 23-hydroxyundecylprodiginine (7). There is a difference of  $m/z$  0.0005 between acquired and predicted mass.

a)

G410-pure #5-238 RT: 0.05-2.00 AV: 117 NL: 2.57E4  
 F: ITMS + p ESI Full ms2 410.28@cid35.0

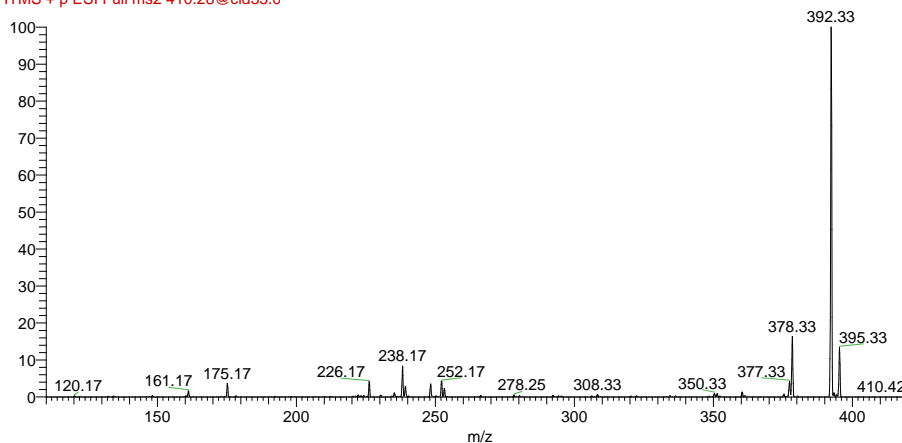

b)

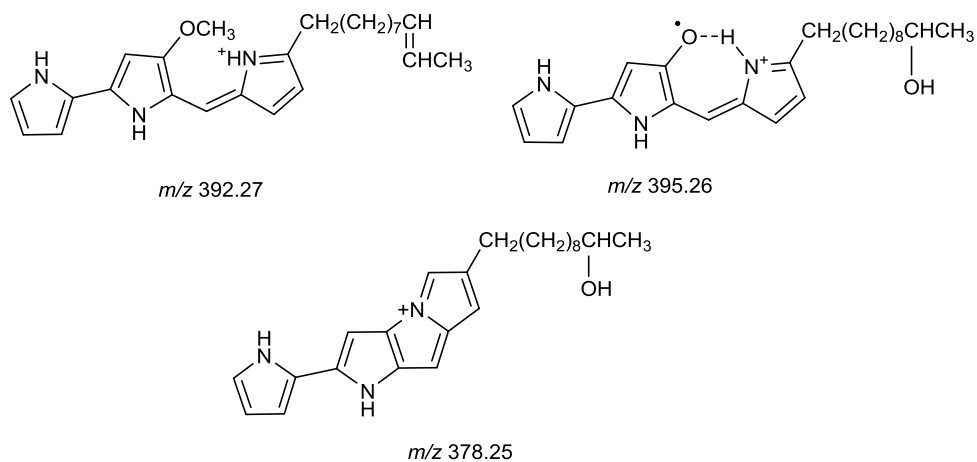

**Figure S28.** a) ESI-CID-MS<sup>n</sup> profile of 23-hydroxyundecylprodiginine (7). The MS/MS profile of 7 is characterized by the presence of  $m/z$  395.33, 392.33, and 378.33 fragments equivalent to the loss of  $m/z$  18, 15 and 32 respectively. Parent ion of  $m/z$  410.28 is not shown. b) Proposed structures of ion fragments shown in ESI-CID-MS<sup>n</sup> profile of 23-hydroxyundecylprodiginine (7).

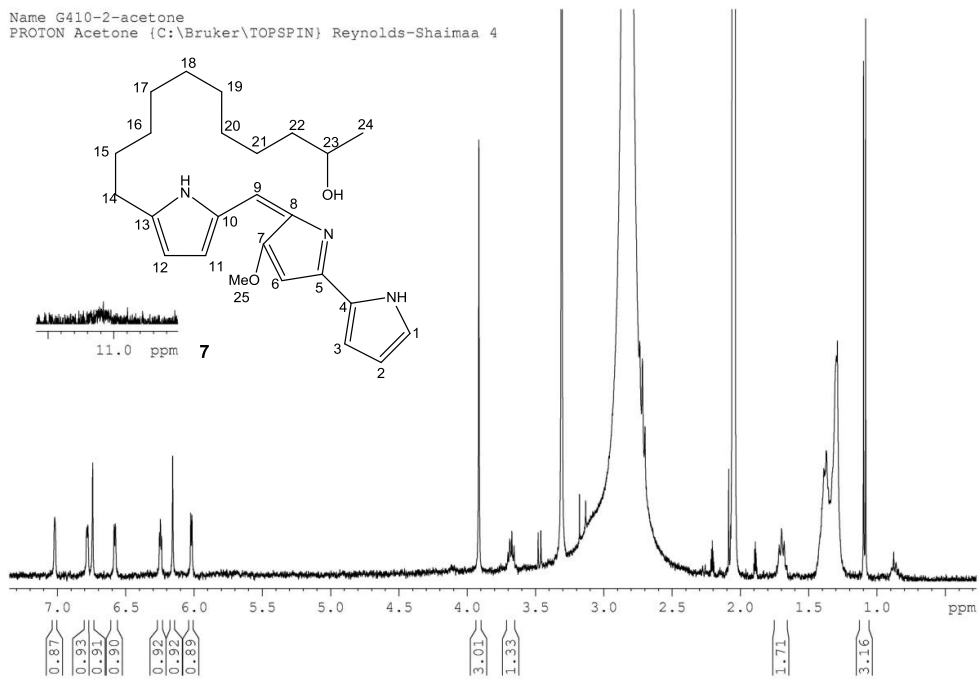

Figure S29.  $^1\text{H}$  NMR spectrum of 23-hydroxyundecylprodiginine (7) (600 MHz, Acetone- $d_6$ )

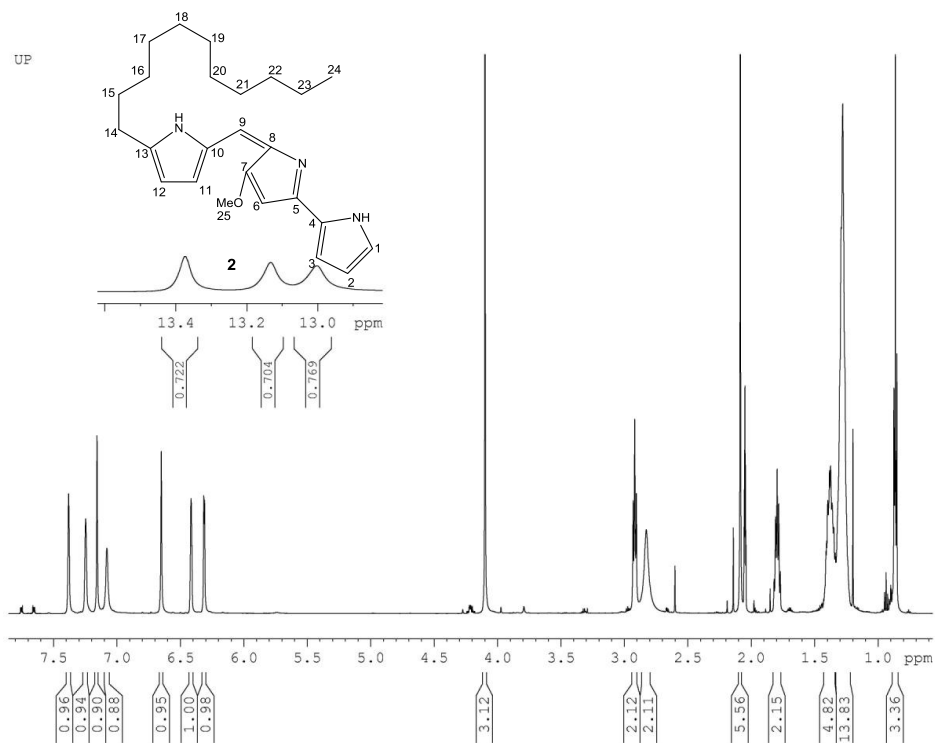

Figure S30.  $^1\text{H}$  NMR spectrum of undecylprodiginine HCl (2) standard (600 MHz, Acetone- $d_6$ )

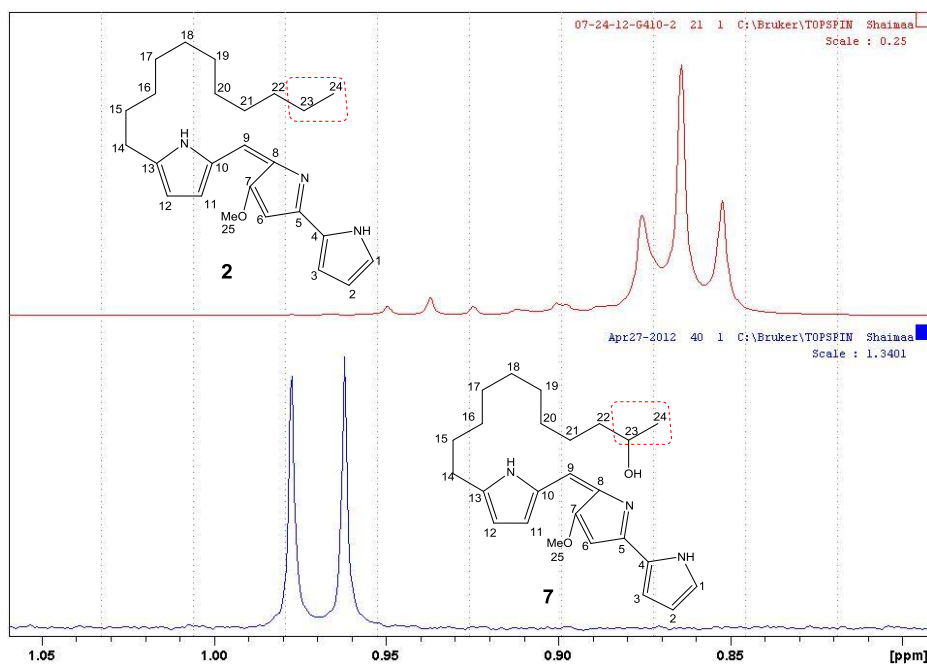

Figure S31. <sup>1</sup>H NMR spectrum showing comparison between the splitting pattern of methyl protons at C-24 in undecylprodiginine (2) and 23-hydroxyundecylprodiginine (7)

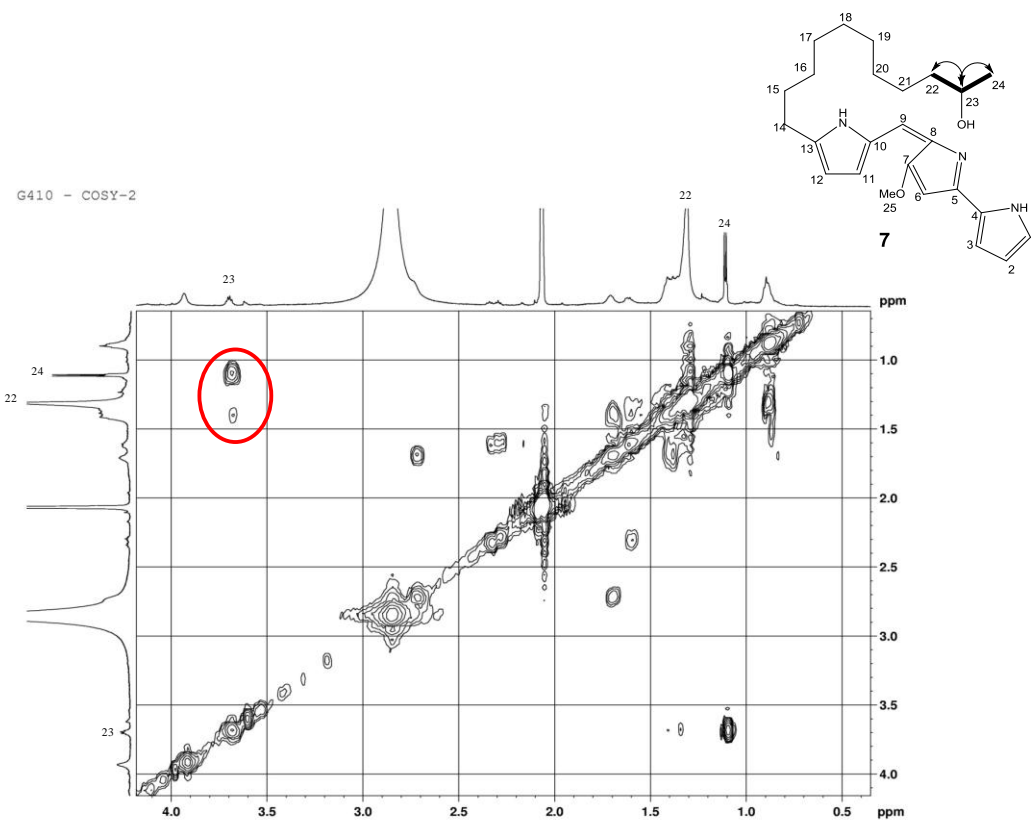

Figure S32: 2D COSY NMR (<sup>1</sup>H↔<sup>1</sup>H) correlations between C-22, C-23, and C-24 of 23-hydroxyundecylprodiginine (7).

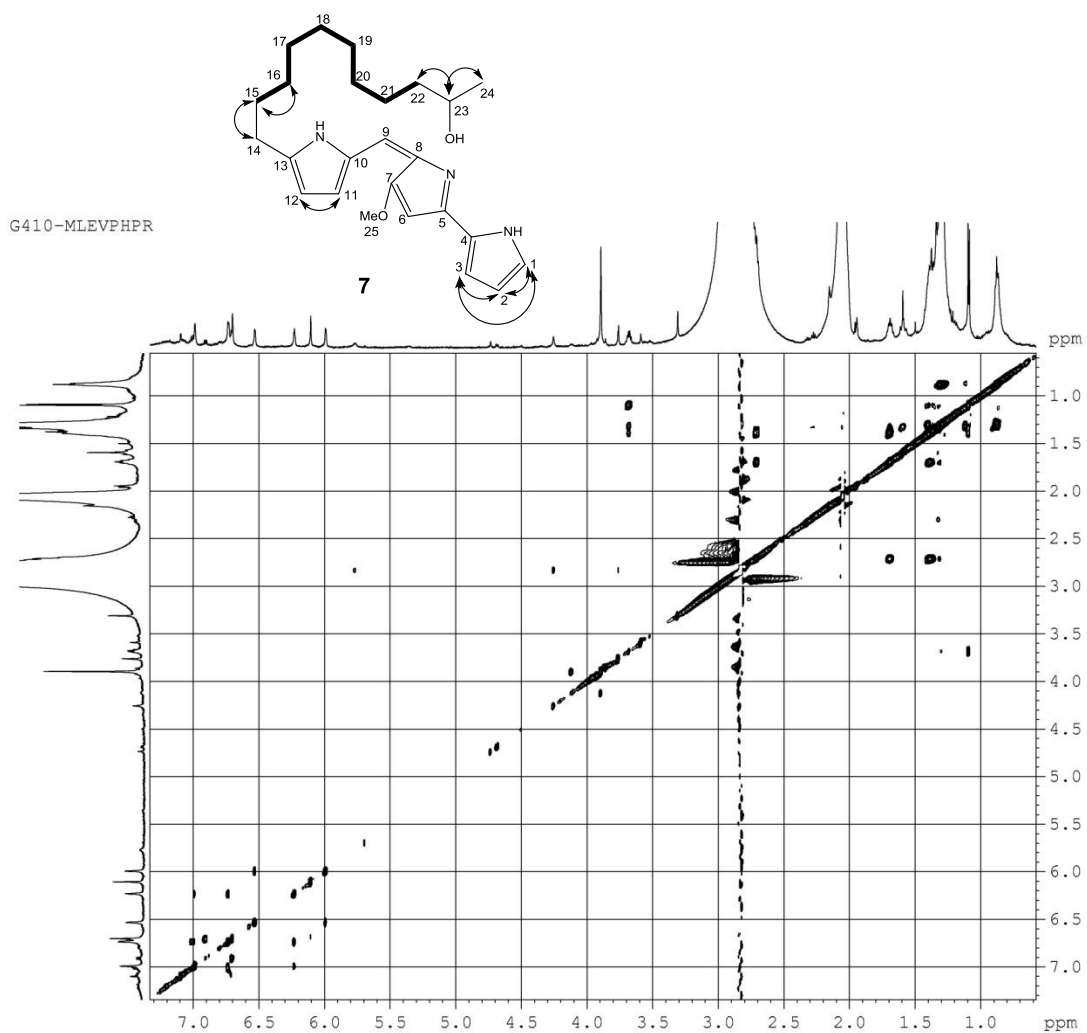

Figure S33. 2D TOCSY ( $^1\text{H} \leftrightarrow ^1\text{H}$ ) spectrum of **7**. The bold bonds indicate 16H integrated into one large peak at 1.3 ppm.



Table S15: <sup>1</sup>H NMR spectral data for 23-hydroxyundecylprodiginine (**7**) (600 MHz, Acetone-d<sub>6</sub>) and side by side comparison of **7** and **2**

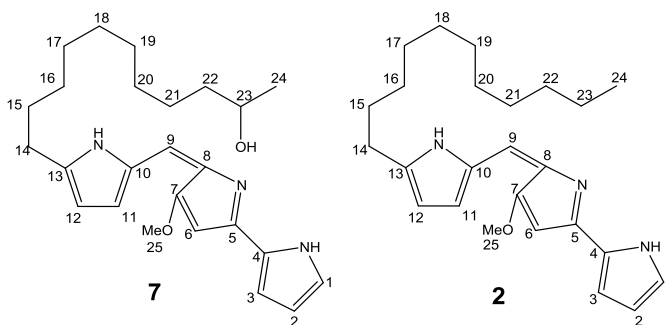

| Position <sup>a</sup> | <b>7</b><br>$\delta_{\text{H}}$ (J in Hz) <sup>a</sup> | <b>2</b><br>$\delta_{\text{H}}$ (J in Hz) <sup>b</sup> |
|-----------------------|--------------------------------------------------------|--------------------------------------------------------|
| 1                     | 7.02, dd (1.4, 2.7)                                    | 7.38, m                                                |
| 2                     | 6.24, dd (2.7, 3.6)                                    | 6.41, m                                                |
| 3                     | 6.78, dd (1.4, 3.6)                                    | 7.24, m                                                |
| 4                     | -                                                      | -                                                      |
| 5                     | -                                                      | -                                                      |
| 6                     | 6.15, s                                                | 6.65, s                                                |
| 7                     | -                                                      | -                                                      |
| 8                     | -                                                      | -                                                      |
| 9                     | 6.74, s                                                | 7.15, s                                                |
| 10                    | -                                                      | -                                                      |
| 11                    | 6.58, d (3.5)                                          | 7.07, d (3.6)                                          |
| 12                    | 6.02, d (3.5)                                          | 6.31, d (3.6)                                          |
| 13                    | -                                                      | -                                                      |
| 14                    | 2.70, t (7.2)                                          | 2.92, t (7.4)                                          |
| 15                    | 1.69, m                                                | 1.79, m                                                |
| 16                    | 1.33, m                                                | 1.38, m                                                |
| 17                    | 1.33, m                                                | 1.38, m                                                |
| 18                    | 1.33, m                                                | 1.38, m                                                |
| 19                    | 1.33, m                                                | 1.38, m                                                |
| 20                    | 1.33, m                                                | 1.38, m                                                |
| 21                    | 1.33, m                                                | 1.38, m                                                |
| 22                    | 1.34, m                                                | 1.38, m                                                |
| 23                    | 3.67, m                                                | 1.28, m                                                |
| 24                    | 1.09, d (6.1)                                          | 0.86, m                                                |
| 25                    | 3.91, s                                                | 4.09, t (7.1)                                          |

<sup>a</sup>Assignments are for protons bonded to the specified positions using 1D (<sup>1</sup>H), and 2D (COSY, TOCSY) NMR spectroscopy in comparison to **2**, <sup>b</sup>chemical shifts reported are for the HCl salt of **2**

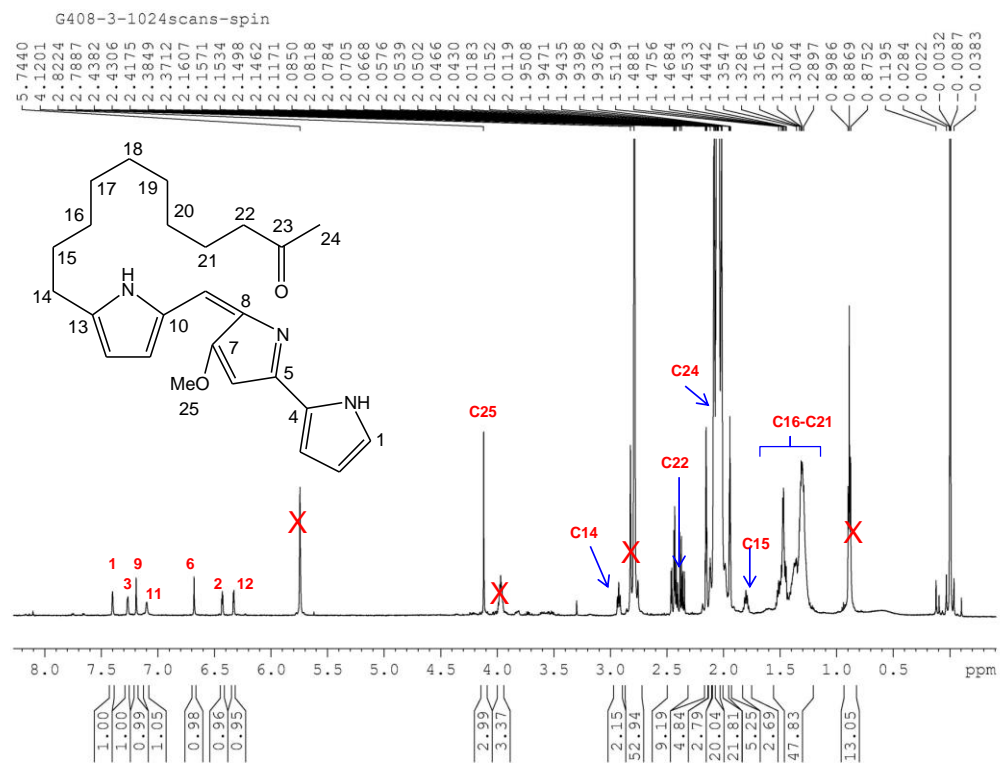

Figure S34.  $^1\text{H}$  NMR spectrum of 23-ketoundecylprodiginine (8) (600 MHz, Acetone- $d_6$ )

G4083\_121031111727 #11-34 RT: 0.11-0.31 AV: 24 NL: 7.38E6  
T: FTMS + p ESI Full ms [100.00-1005.99]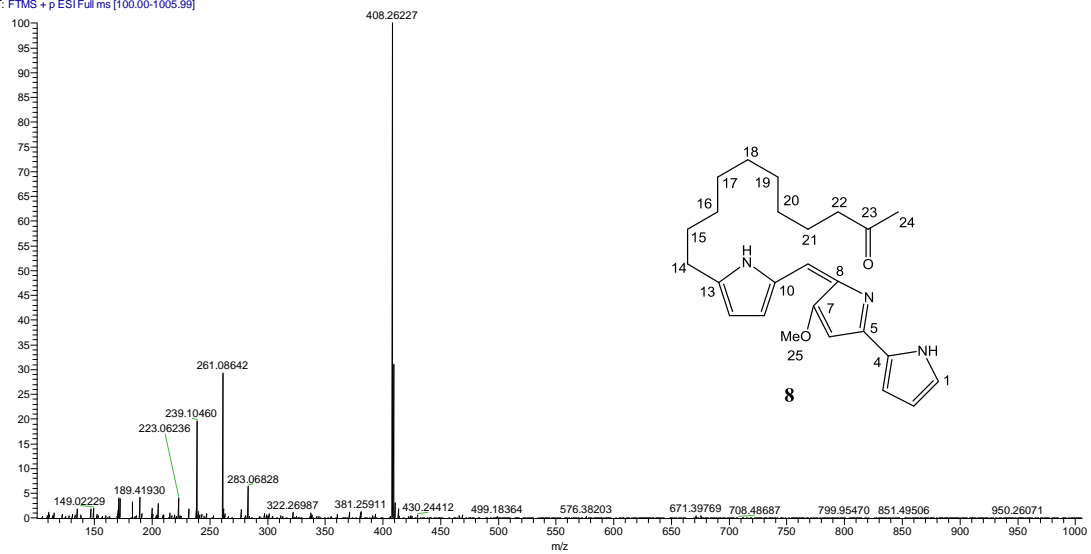

Figure S35. HRMS (ESI) of 23-ketoundecylprodiginine (8)

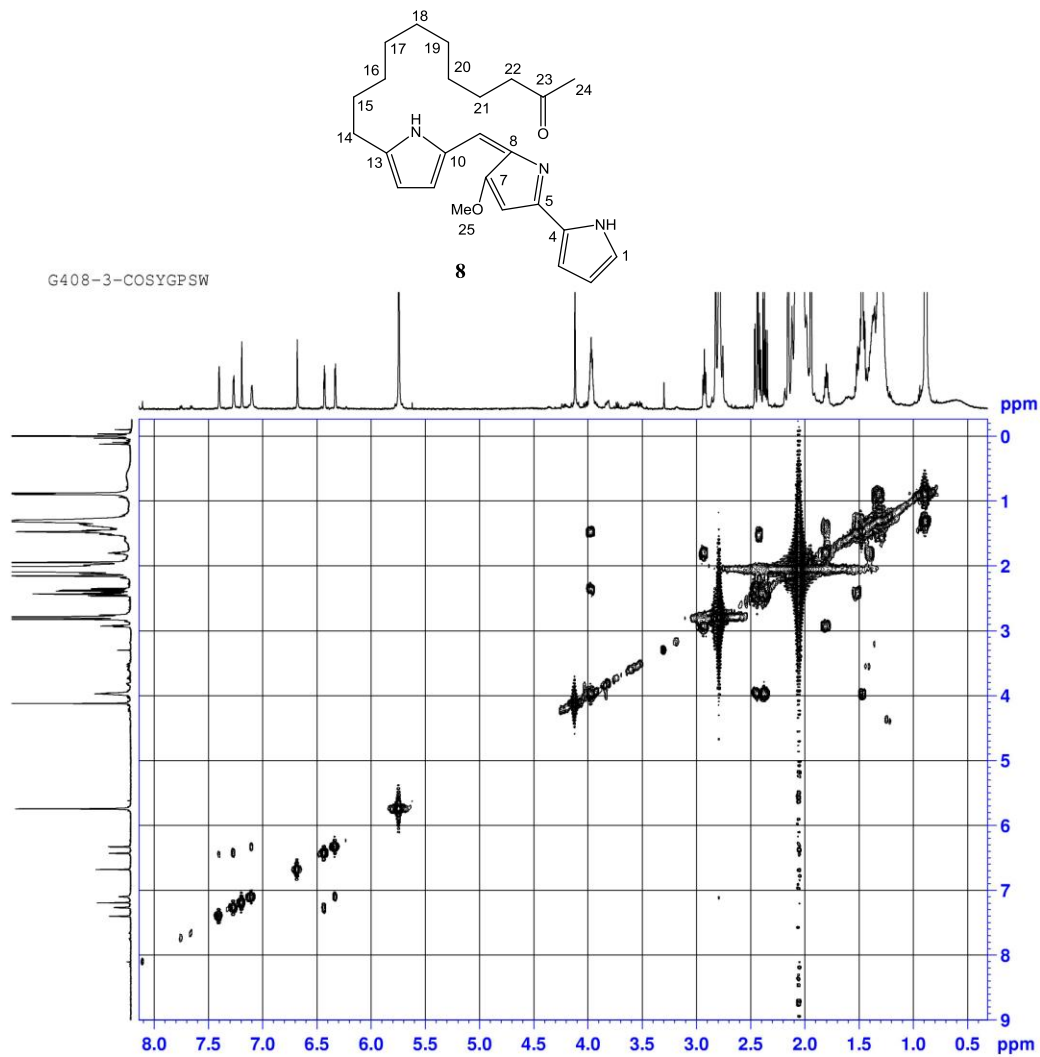

Figure S36. 2D COSY ( $^1\text{H}\leftrightarrow^1\text{H}$ ) spectrum of 23-ketoundecylprodiginine (8)

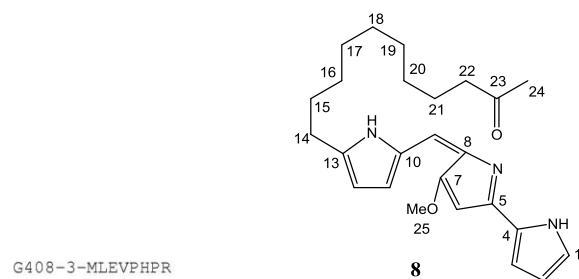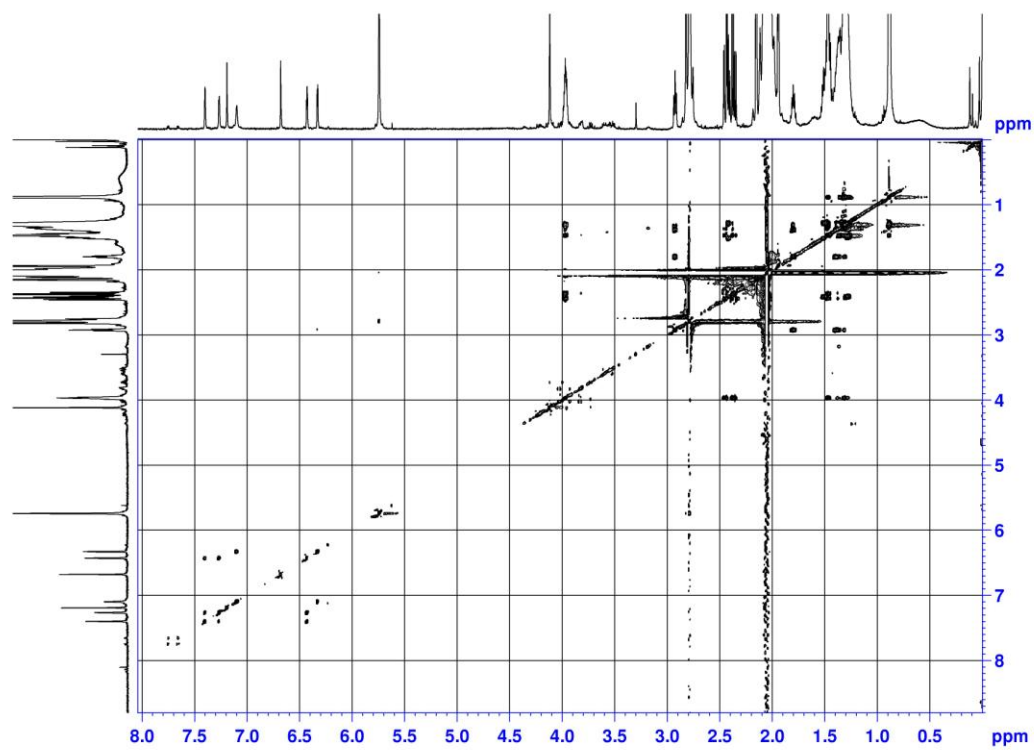

Figure S37. 2D TOCSY ( $^1\text{H} \leftrightarrow ^1\text{H}$ ) spectrum of 23-ketoundecylprodiginine (**8**)

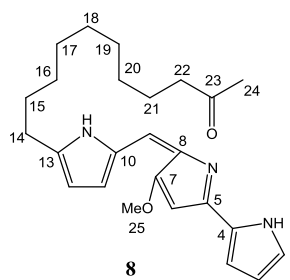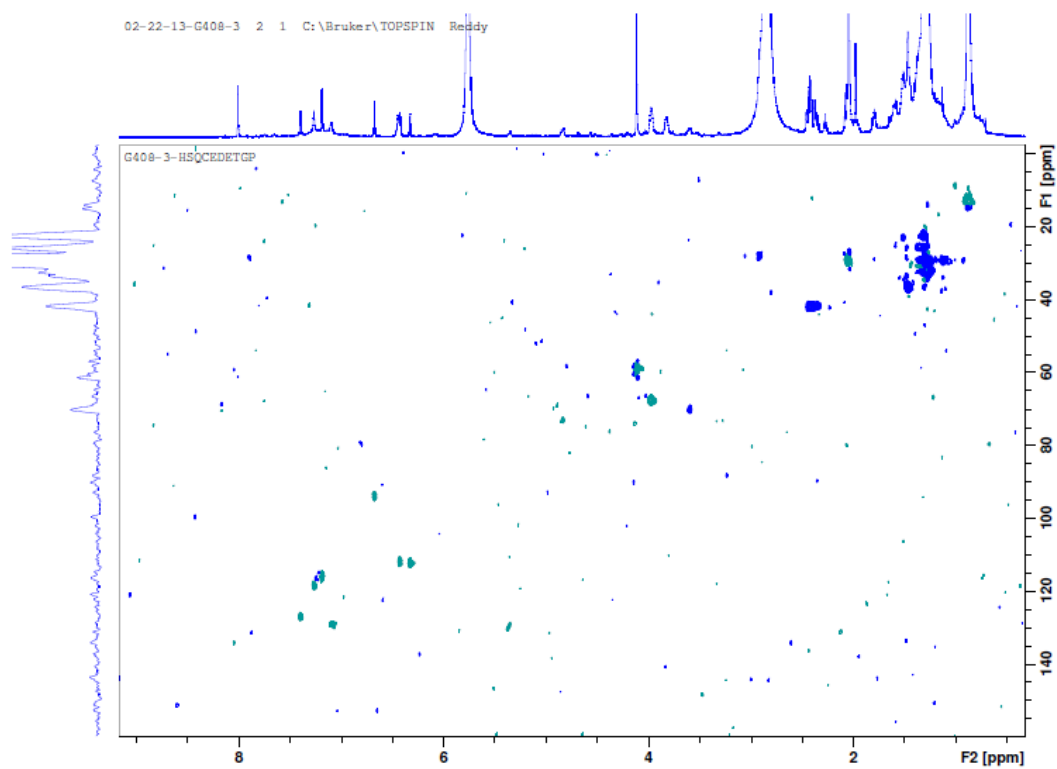

Figure S38. 2D HSQC ( $^1\text{H} \rightarrow ^{13}\text{C}$ ) spectrum of 23-ketoundecylprodiginine (**8**)

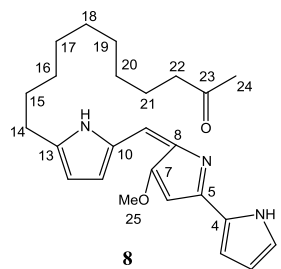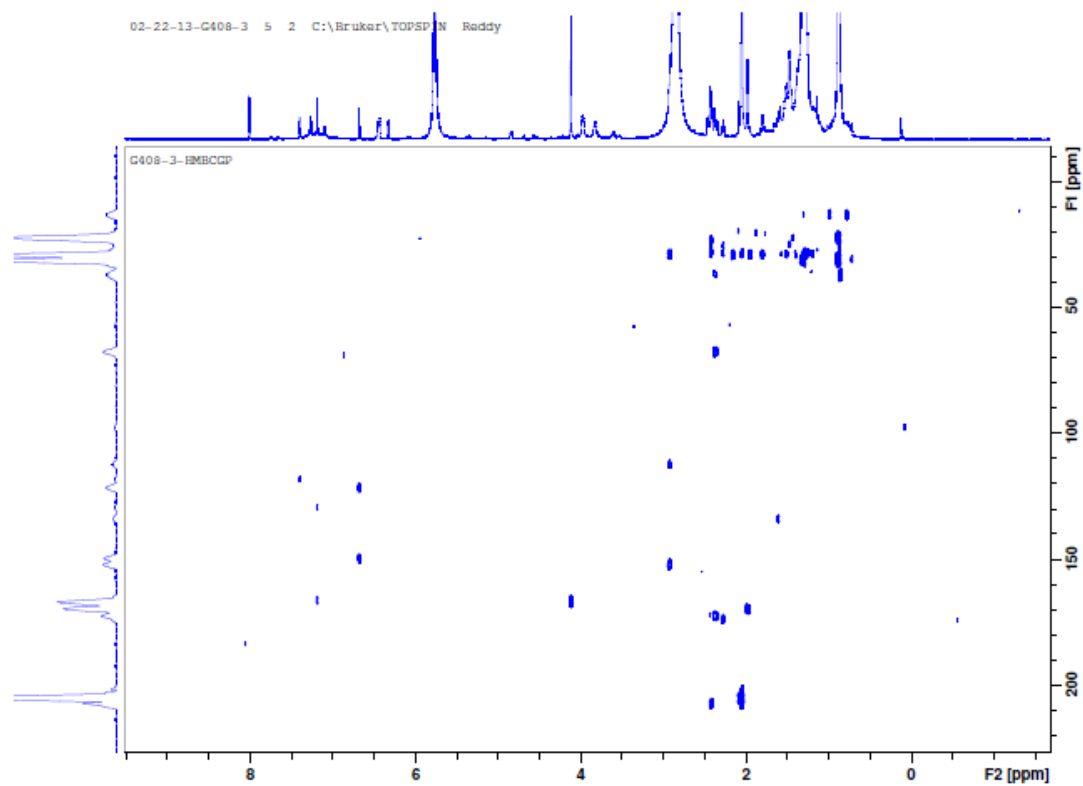

Figure S39. 2D HMBC ( $^1\text{H} \rightarrow ^{13}\text{C}$ ) spectrum of 23-ketoundecylprodiginine (8)

Table S16. NMR spectral data, and selected HMBC ( $^1\text{H} \rightarrow ^{13}\text{C}$  correlations) for **8** (600 MHz, Acetone- $d_6$ )

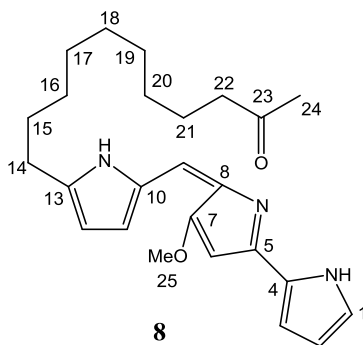

| Position           | $\delta_{\text{H}}$ (J in Hz) <sup>a</sup> | $\delta_{\text{C}}$ <sup>a</sup> |                 | Selected HMBC correlations |
|--------------------|--------------------------------------------|----------------------------------|-----------------|----------------------------|
| 1                  | 7.40, dd (1.5, 2.1)                        | 127.1                            | CH              | 3, 4                       |
| 2                  | 6.42, dd (2.1, 3.7)                        | 112.1                            | CH              |                            |
| 3                  | 7.26, dd (1.5, 3.7)                        | 118.4                            | CH              |                            |
| 4                  | -                                          | 122.5                            | C               |                            |
| 5                  | -                                          | N.D                              | C               |                            |
| 6                  | 6.68, s                                    | 94.1                             | CH              | 4, 8                       |
| 7                  | -                                          | 167.2                            | C               |                            |
| 8                  | -                                          | 149.4                            | C               |                            |
| 9                  | 7.19, s                                    | 115.9                            | CH              | 7, 10                      |
| 10                 |                                            | 129.5                            | C               |                            |
| 11                 | 7.09, d (3.4)                              | 129.1                            | CH              |                            |
| 12                 | 6.32, d (3.4)                              | 112.7                            | CH              |                            |
| 13                 | -                                          | N.D                              | C               |                            |
| 14                 | 2.92, t (7.5)                              | 28.1                             | CH <sub>2</sub> | 12, 15, 16                 |
| 15                 | 1.80, m                                    | 28.3                             | CH <sub>2</sub> | 14, 16                     |
| 16-21 <sup>b</sup> | 1.51-1.28, m                               | N.D                              | CH <sub>2</sub> |                            |
| 22                 | 2.46, t (7.2)                              | 42.0                             | CH <sub>2</sub> | 21, 23, 24                 |
| 23                 | -                                          | 207.1                            | C=O             |                            |
| 24                 | 2.04, s                                    | 26.9                             | CH <sub>3</sub> | 23                         |
| 25                 | 4.12, s                                    | 59.2                             | CH <sub>3</sub> | 7                          |

<sup>a</sup> assignment by 1D, and 2D NMR spectroscopy; <sup>b</sup> protons of C16-C21 are overlapped; N.D.: not determined



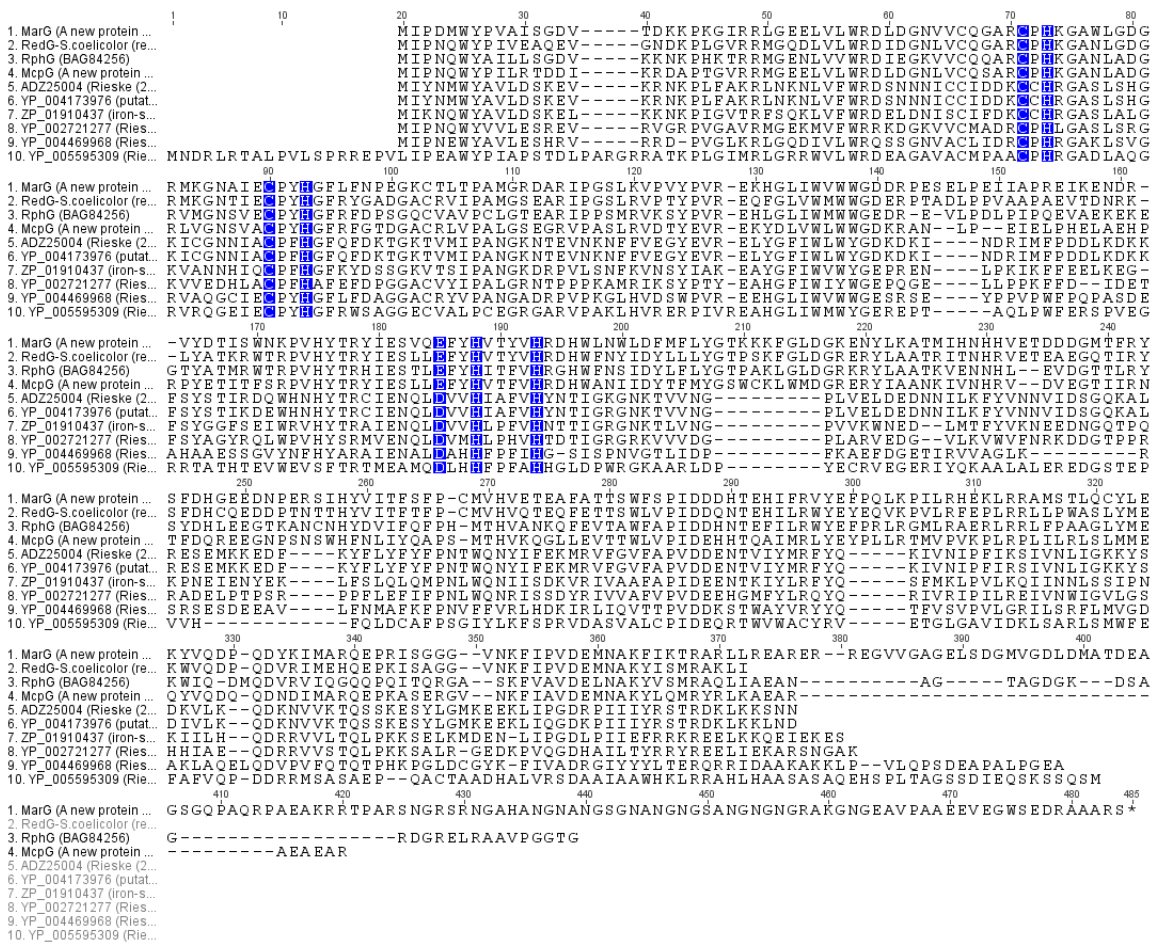

**Figure S40. Sequence alignment of MarG and RedG with other Rieske-oxygenases.** MarG and RedG share the CXH, CXXH motifs of other Rieske-oxygenases at their N-terminal end and DXXHX<sub>4</sub>H motif at the C-terminal end. It should be noted that the conserved aspartate (D) is glutamate (E) in MarG and RedG.

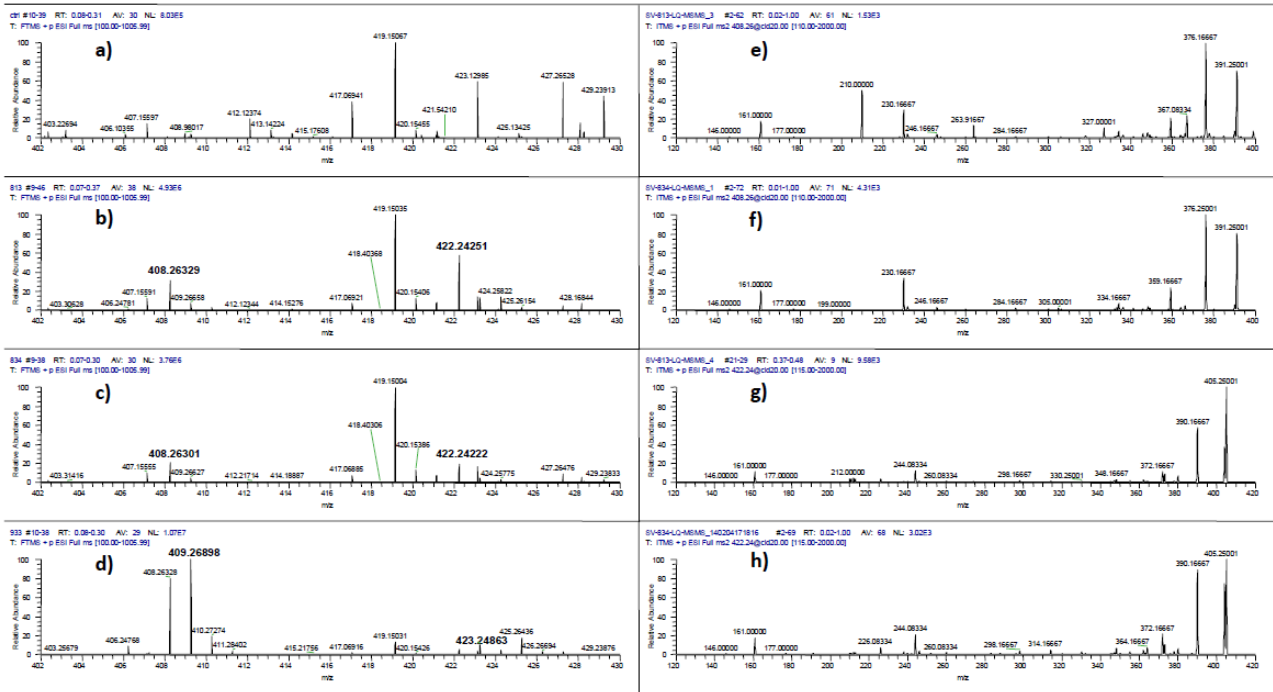

**Figure S41. Total ion chromatogram (TIC) of total extract of *S. venezuelae* expressing MarG after feeding of 7, 8 and [23-d]-7.** a) The MS profile of *S. venezuelae* expressing *marG*; b) The MS profile of *S. venezuelae* expressing *marG* fed with 23-hydroxyundecylprodiginine (**7**),  $m/z$  408.26 and  $m/z$  422.24 corresponding to  $[M+H]^+$  of premarineosin (**9**) and 16-Ketopremarineosin (**10**); c) The MS profile of *S. venezuelae* expressing *marG* fed with 23-ketoundecylprodiginine (**8**),  $m/z$  408.26 and  $m/z$  422.24 corresponding to  $[M+H]^+$  of premarineosin (**9**) and 16-Ketopremarineosin (**10**); d) The MS profile of *S. venezuelae* expressing *marG* fed with 23-deuterated-hydroxyundecylprodiginine (~90% D),  $m/z$  409.27 and  $m/z$  423.25 corresponding to  $[M+H]^+$  of 23-deuterated-premarineosin and 23-deuterated-16-Ketopremarineosin; e) The MS/MS profile of **9** from *S. venezuelae* expressing *marG* fed with **7** (Same as in Figure S12); f) The MS/MS profile of **9** from *S. venezuelae* expressing *marG* fed with **8** (Same as in Figure S12); g) The MS/MS profile of **10** from *S. venezuelae* expressing *marG* fed with **7** (Same as in Figure S14); h) The MS/MS profile of **10** from *S. venezuelae* expressing *marG* fed with **8** (Same as in Figure S14).

## References

- Boonlarppradab, C.; Kauffman, C. A.; Jensen, P. R.; Fenical, W. *Org. Lett.* 2008, 10, 5505–5508.
- Cai, X. C.; Wu, X.; Snider, B. B. *Org. Lett.* 2010, 12, 1600–1603.
